# Supplementary material for: CM-Dil Staining and SEC of Plasma as an Approach to Increase Sensitivity of Extracellular Nanovesicles Quantification by Bead-Assisted Flow Cytometry
Source: MDPI journal article supplement (doi:10.3390/membranes11070526), 2021-07-13
Supplement: s1 [file s1]

*Supplementary information*

# **CM-Dil Staining and SEC of Plasma as an Approach to Increase Sensitivity of Extracellular Nanovesicles Quantification by Bead-Assisted Flow Cytometry**

**Nadezhda Nikiforova <sup>1</sup>, Maria Chumachenko <sup>2</sup>, Inga Nazarova <sup>1</sup>, Lidia Zabegina <sup>1</sup>, Maria Slyusarenko <sup>1,3</sup>, Elena Sidina <sup>1</sup> and Anastasia Malek <sup>1,4,\*</sup>**

<sup>1</sup> Subcellular technology Laboratory., N.N. Petrov National Medical Center of Oncology, 197758 St. Petersburg, Russia; niki2naden\_ka@mail.ru (N.N.); oblaka12@mail.ru (I.N.); lidusikza@yandex.ru (L.Z.); slusarenko\_masha@mail.ru (M.S.); sidina@mail.ru (E.S.)

<sup>2</sup> Deptment of Biochemistry, Belarusian State University, 220030 Minsk, Belarus; chumachenkomaria19@gmail.com (M.C.)

<sup>3</sup> The Faculty of Physics, Saint-Petersburg State University, 199034 St. Petersburg, Russia;

<sup>4</sup> Oncosystem Ltd., 121205 Moscow, Russia

\* Correspondence: anastasia@malek.com; Tel.: +7-960-250-46-80

Figure S1: CM-Dil, SEC fraction: 5-6

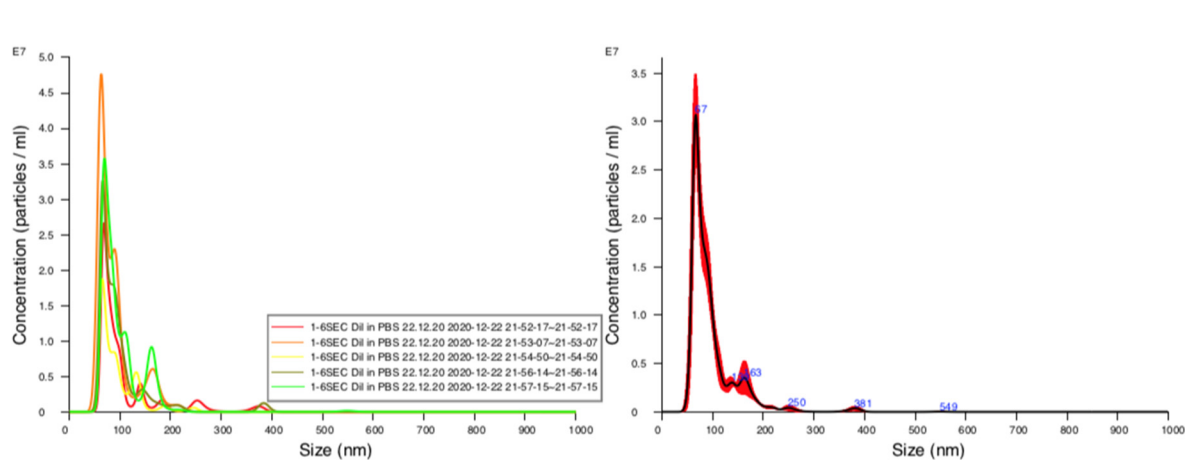

FTLA Concentration / Size graph for Experiment:  
1-6SEC Dil in PBS 22.12.20 2020-12-22 21-51-35

Averaged FTLA Concentration / Size for Experiment:  
1-6SEC Dil in PBS 22.12.20 2020-12-22 21-51-35  
Error bars indicate + / -1 standard error of the mean

|                                                                                                                                                                                                                                                                                                                                                                                                                                                                                                                                                                                                                                                                                                                                                                                                                                                                                                                                                                                                                            |                                                                                                                                                                                                                                                                                                                                                                                                                                                                                                 |
|----------------------------------------------------------------------------------------------------------------------------------------------------------------------------------------------------------------------------------------------------------------------------------------------------------------------------------------------------------------------------------------------------------------------------------------------------------------------------------------------------------------------------------------------------------------------------------------------------------------------------------------------------------------------------------------------------------------------------------------------------------------------------------------------------------------------------------------------------------------------------------------------------------------------------------------------------------------------------------------------------------------------------|-------------------------------------------------------------------------------------------------------------------------------------------------------------------------------------------------------------------------------------------------------------------------------------------------------------------------------------------------------------------------------------------------------------------------------------------------------------------------------------------------|
| <p><b>Included Files</b></p> <p>1-6SEC Dil in PBS 22.12.20 2020-12-22 21-52-17<br/>1-6SEC Dil in PBS 22.12.20 2020-12-22 21-53-07<br/>1-6SEC Dil in PBS 22.12.20 2020-12-22 21-54-50<br/>1-6SEC Dil in PBS 22.12.20 2020-12-22 21-56-14<br/>1-6SEC Dil in PBS 22.12.20 2020-12-22 21-57-15</p> <p><b>Details</b></p> <p>NTA Version: NTA 3.4 Build 3.4.003<br/>Script Used: SOP Standard Measurement 09-51-35PM 22~<br/>Time Captured: 21:51:35 22/12/2020<br/>Operator: Nadya<br/>Pre-treatment:<br/>Sample Name: 1-6SEC Dil in PBS 22.12.20<br/>Diluent: PBS<br/>Remarks:</p> <p><b>Capture Settings</b></p> <p>Camera Type: sCMOS<br/>Laser Type: Blue488<br/>Camera Level: 15<br/>Slider Shutter: 1206<br/>Slider Gain: 245<br/>FPS: 25.0<br/>Number of Frames: 749<br/>Temperature: 25.3 - 25.5 °C<br/>Viscosity: (Water) 0.878 - 0.883 cP<br/>Dilution factor: Dilution not recorded</p> <p><b>Analysis Settings</b></p> <p>Detect Threshold: 7<br/>Blur Size: Auto<br/>Max Jump Distance: Auto: 15.7 - 17.2 pix</p> | <p><b>Results</b></p> <p>Stats: Merged Data</p> <p>Mean: 96.7 nm<br/>Mode: 66.6 nm<br/>SD: 49.2 nm<br/>D10: 61.0 nm<br/>D50: 81.2 nm<br/>D90: 158.2 nm</p> <p>Stats: Mean +/- Standard Error</p> <p>Mean: 97.6 +/- 3.2 nm<br/>Mode: 66.4 +/- 1.2 nm<br/>SD: 48.7 +/- 5.7 nm<br/>D10: 61.8 +/- 1.5 nm<br/>D50: 81.3 +/- 1.5 nm<br/>D90: 159.2 +/- 8.5 nm</p> <p>Concentration (Upgrade): 1.25e+09 +/- 1.95e+08 particles/ml<br/>73.9 +/- 10.1 particles/frame<br/>76.5 +/- 8.5 centres/frame</p> |
|----------------------------------------------------------------------------------------------------------------------------------------------------------------------------------------------------------------------------------------------------------------------------------------------------------------------------------------------------------------------------------------------------------------------------------------------------------------------------------------------------------------------------------------------------------------------------------------------------------------------------------------------------------------------------------------------------------------------------------------------------------------------------------------------------------------------------------------------------------------------------------------------------------------------------------------------------------------------------------------------------------------------------|-------------------------------------------------------------------------------------------------------------------------------------------------------------------------------------------------------------------------------------------------------------------------------------------------------------------------------------------------------------------------------------------------------------------------------------------------------------------------------------------------|

Figure S2: CM-Dil, SEC fraction: 7-8

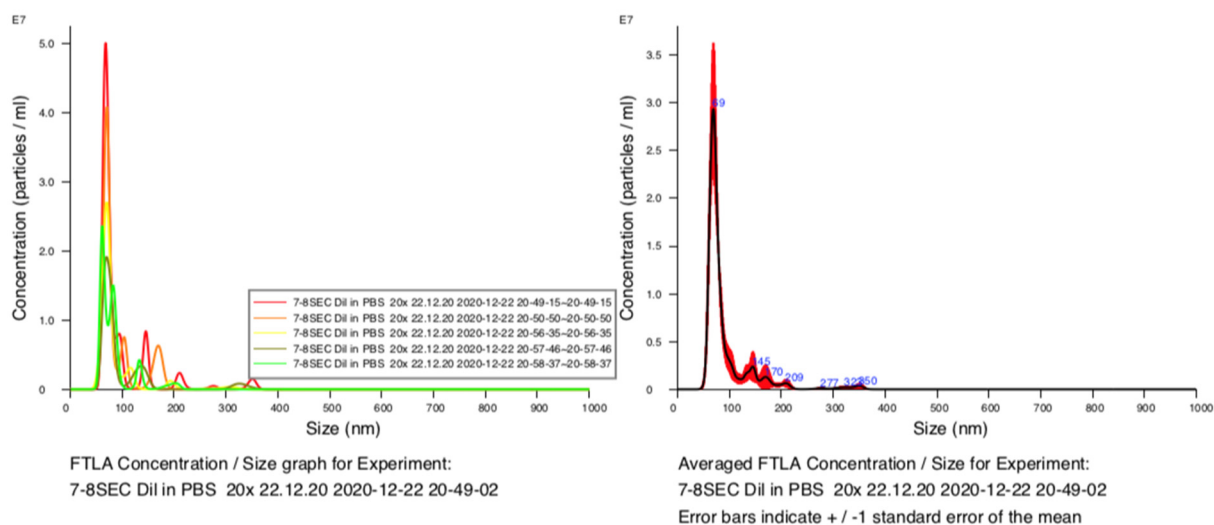

|                                                                                                                                                                                                                                                                                                                                                                                                                                                                                                                                                                                                                                                                                                                                                                                                                                                                                                                                                                                                                                                     |                                                                                                                                                                                                                                                                                                                                                                                                                                                                                                |
|-----------------------------------------------------------------------------------------------------------------------------------------------------------------------------------------------------------------------------------------------------------------------------------------------------------------------------------------------------------------------------------------------------------------------------------------------------------------------------------------------------------------------------------------------------------------------------------------------------------------------------------------------------------------------------------------------------------------------------------------------------------------------------------------------------------------------------------------------------------------------------------------------------------------------------------------------------------------------------------------------------------------------------------------------------|------------------------------------------------------------------------------------------------------------------------------------------------------------------------------------------------------------------------------------------------------------------------------------------------------------------------------------------------------------------------------------------------------------------------------------------------------------------------------------------------|
| <p><b>Included Files</b></p> <p>7-8SEC Dil in PBS 20x 22.12.20 2020-12-22 20-49-15<br/>7-8SEC Dil in PBS 20x 22.12.20 2020-12-22 20-50-50<br/>7-8SEC Dil in PBS 20x 22.12.20 2020-12-22 20-56-35<br/>7-8SEC Dil in PBS 20x 22.12.20 2020-12-22 20-57-46<br/>7-8SEC Dil in PBS 20x 22.12.20 2020-12-22 20-58-37</p> <p><b>Details</b></p> <p>NTA Version: NTA 3.4 Build 3.4.003<br/>Script Used: SOP Standard Measurement 08-49-02PM 22~<br/>Time Captured: 20:49:02 22/12/2020<br/>Operator: Nadya<br/>Pre-treatment:<br/>Sample Name: 7-8SEC Dil in PBS 20x 22.12.20<br/>Diluent: PBS<br/>Remarks:</p> <p><b>Capture Settings</b></p> <p>Camera Type: sCMOS<br/>Laser Type: Blue488<br/>Camera Level: 15<br/>Slider Shutter: 1206<br/>Slider Gain: 245<br/>FPS: 25.0<br/>Number of Frames: 749<br/>Temperature: 24.9 - 25.3 °C<br/>Viscosity: (Water) 0.883 - 0.890 cP<br/>Dilution factor: Dilution not recorded</p> <p><b>Analysis Settings</b></p> <p>Detect Threshold: 17<br/>Blur Size: Auto<br/>Max Jump Distance: Auto: 16.2 - 18.1 pix</p> | <p><b>Results</b></p> <p>Stats: Merged Data</p> <p>Mean: 91.2 nm<br/>Mode: 68.9 nm<br/>SD: 49.1 nm<br/>D10: 61.4 nm<br/>D50: 73.6 nm<br/>D90: 147.6 nm</p> <p>Stats: Mean +/- Standard Error</p> <p>Mean: 90.8 +/- 2.8 nm<br/>Mode: 67.9 +/- 1.7 nm<br/>SD: 47.0 +/- 5.6 nm<br/>D10: 61.4 +/- 0.9 nm<br/>D50: 73.9 +/- 0.7 nm<br/>D90: 141.9 +/- 8.0 nm</p> <p>Concentration (Upgrade): 7.95e+08 +/- 1.02e+08 particles/ml<br/>27.2 +/- 3.5 particles/frame<br/>28.6 +/- 3.6 centres/frame</p> |
|-----------------------------------------------------------------------------------------------------------------------------------------------------------------------------------------------------------------------------------------------------------------------------------------------------------------------------------------------------------------------------------------------------------------------------------------------------------------------------------------------------------------------------------------------------------------------------------------------------------------------------------------------------------------------------------------------------------------------------------------------------------------------------------------------------------------------------------------------------------------------------------------------------------------------------------------------------------------------------------------------------------------------------------------------------|------------------------------------------------------------------------------------------------------------------------------------------------------------------------------------------------------------------------------------------------------------------------------------------------------------------------------------------------------------------------------------------------------------------------------------------------------------------------------------------------|

Figure S3: CM-Dil, SEC fraction: 9-11

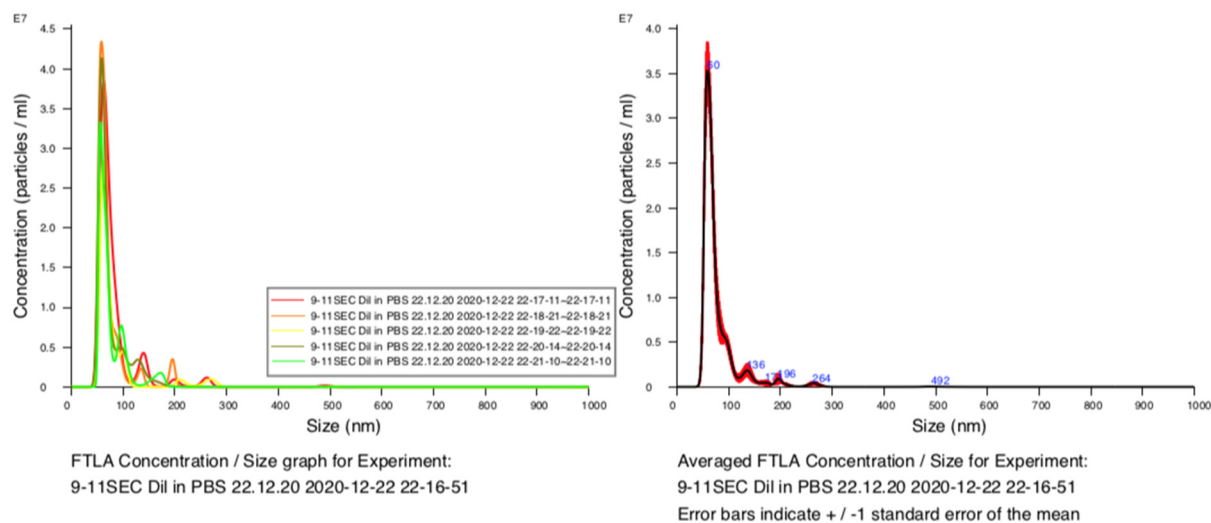

|                                                                                                                                                                                                                                                                                                                                                                                                                                                                                                                                                                                                                                                                                                                                                                                                                                                                                                                                                                                                                                  |                                                                                                                                                                                                                                                                                                                                                                                                                                                                                                |
|----------------------------------------------------------------------------------------------------------------------------------------------------------------------------------------------------------------------------------------------------------------------------------------------------------------------------------------------------------------------------------------------------------------------------------------------------------------------------------------------------------------------------------------------------------------------------------------------------------------------------------------------------------------------------------------------------------------------------------------------------------------------------------------------------------------------------------------------------------------------------------------------------------------------------------------------------------------------------------------------------------------------------------|------------------------------------------------------------------------------------------------------------------------------------------------------------------------------------------------------------------------------------------------------------------------------------------------------------------------------------------------------------------------------------------------------------------------------------------------------------------------------------------------|
| <p><b>Included Files</b></p> <p>9-11SEC Dil in PBS 22.12.20 2020-12-22 22-17-11<br/>9-11SEC Dil in PBS 22.12.20 2020-12-22 22-18-21<br/>9-11SEC Dil in PBS 22.12.20 2020-12-22 22-19-22<br/>9-11SEC Dil in PBS 22.12.20 2020-12-22 22-20-14<br/>9-11SEC Dil in PBS 22.12.20 2020-12-22 22-21-10</p> <p><b>Details</b></p> <p>NTA Version: NTA 3.4 Build 3.4.003<br/>Script Used: SOP Standard Measurement 10-16-51PM 22~<br/>Time Captured: 22:16:51 22/12/2020<br/>Operator: Nadya<br/>Pre-treatment:<br/>Sample Name: 9-11SEC Dil in PBS 22.12.20<br/>Diluent: PBS<br/>Remarks:</p> <p><b>Capture Settings</b></p> <p>Camera Type: sCMOS<br/>Laser Type: Blue488<br/>Camera Level: 15<br/>Slider Shutter: 1206<br/>Slider Gain: 245<br/>FPS: 25.0<br/>Number of Frames: 749<br/>Temperature: 25.7 - 25.9 °C<br/>Viscosity: (Water) 0.871 - 0.874 cP<br/>Dilution factor: Dilution not recorded</p> <p><b>Analysis Settings</b></p> <p>Detect Threshold: 7<br/>Blur Size: Auto<br/>Max Jump Distance: Auto: 17.2 - 18.5 pix</p> | <p><b>Results</b></p> <p>Stats: Merged Data</p> <p>Mean: 78.2 nm<br/>Mode: 59.2 nm<br/>SD: 40.5 nm<br/>D10: 53.7 nm<br/>D50: 65.6 nm<br/>D90: 112.4 nm</p> <p>Stats: Mean +/- Standard Error</p> <p>Mean: 78.3 +/- 2.3 nm<br/>Mode: 59.3 +/- 1.2 nm<br/>SD: 38.9 +/- 6.4 nm<br/>D10: 53.9 +/- 0.5 nm<br/>D50: 65.6 +/- 1.0 nm<br/>D90: 112.6 +/- 6.0 nm</p> <p>Concentration (Upgrade): 9.78e+08 +/- 9.32e+07 particles/ml<br/>52.3 +/- 5.3 particles/frame<br/>52.7 +/- 4.7 centres/frame</p> |
|----------------------------------------------------------------------------------------------------------------------------------------------------------------------------------------------------------------------------------------------------------------------------------------------------------------------------------------------------------------------------------------------------------------------------------------------------------------------------------------------------------------------------------------------------------------------------------------------------------------------------------------------------------------------------------------------------------------------------------------------------------------------------------------------------------------------------------------------------------------------------------------------------------------------------------------------------------------------------------------------------------------------------------|------------------------------------------------------------------------------------------------------------------------------------------------------------------------------------------------------------------------------------------------------------------------------------------------------------------------------------------------------------------------------------------------------------------------------------------------------------------------------------------------|



Figure S4: CM-Dil, SEC fraction: 12-13

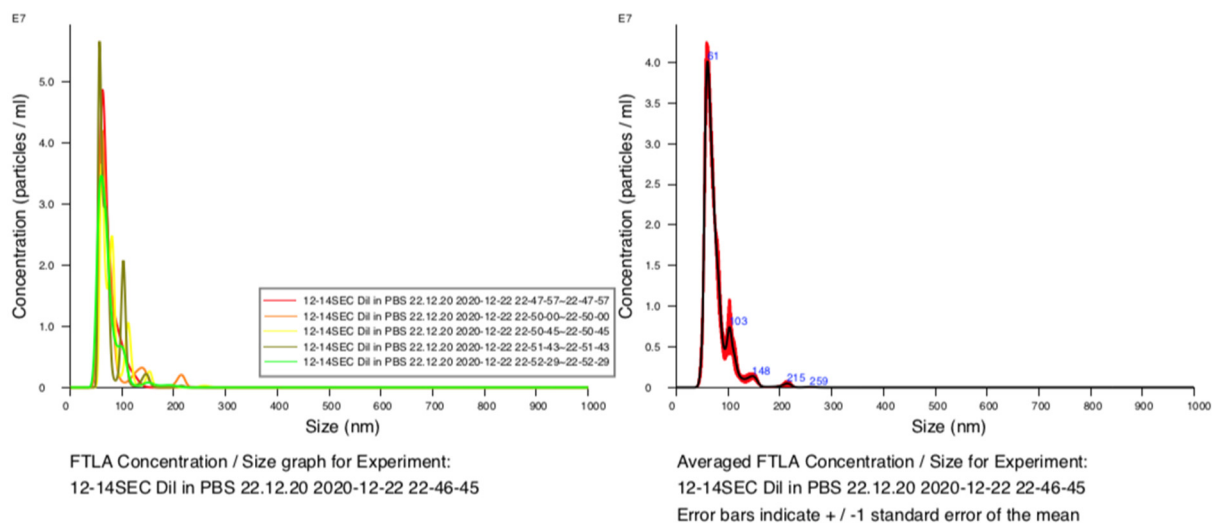

#### Included Files

12-14SEC Dil in PBS 22.12.20 2020-12-22 22-47-57  
12-14SEC Dil in PBS 22.12.20 2020-12-22 22-50-00  
12-14SEC Dil in PBS 22.12.20 2020-12-22 22-50-45  
12-14SEC Dil in PBS 22.12.20 2020-12-22 22-51-43  
12-14SEC Dil in PBS 22.12.20 2020-12-22 22-52-29

#### Details

NTA Version: NTA 3.4 Build 3.4.003  
Script Used: SOP Standard Measurement 10-46-45PM 22~  
Time Captured: 22:46:45 22/12/2020  
Operator: Nadya  
Pre-treatment:  
Sample Name: 12-14SEC Dil in PBS 22.12.20  
Diluent: PBS  
Remarks:

#### Capture Settings

Camera Type: sCMOS  
Laser Type: Blue488  
Camera Level: 15  
Slider Shutter: 1206  
Slider Gain: 245  
FPS: 25.0  
Number of Frames: 749  
Temperature: 26.1 - 26.2 °C  
Viscosity: (Water) 0.866 - 0.868 cP  
Dilution factor: Dilution not recorded

#### Analysis Settings

Detect Threshold: 7  
Blur Size: Auto  
Max Jump Distance: Auto: 17.7 - 18.3 pix

#### Results

##### Stats: Merged Data

Mean: 76.0 nm  
Mode: 60.2 nm  
SD: 26.3 nm  
D10: 55.4 nm  
D50: 67.9 nm  
D90: 106.5 nm

##### Stats: Mean +/- Standard Error

Mean: 76.2 +/- 1.7 nm  
Mode: 60.3 +/- 1.0 nm  
SD: 25.7 +/- 2.5 nm  
D10: 55.6 +/- 1.0 nm  
D50: 68.6 +/- 1.7 nm  
D90: 109.2 +/- 5.3 nm  
Concentration (Upgrade): 1.13e+09 +/- 4.53e+07 particles/ml  
50.0 +/- 1.7 particles/frame  
51.0 +/- 1.8 centres/frame

Figure S5: CM-Dil, SEC fraction: 16-21

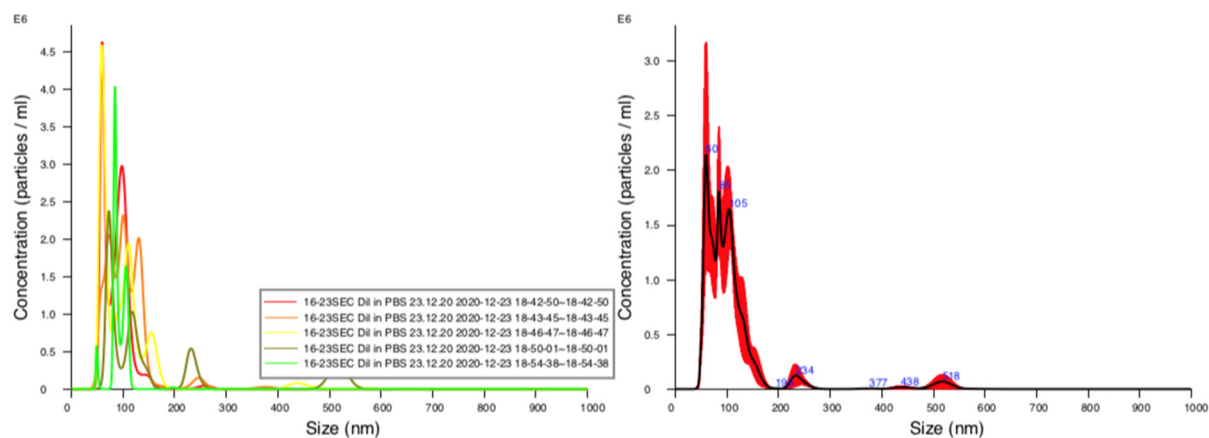

FTLA Concentration / Size graph for Experiment:  
16-23SEC Dil in PBS 23.12.20 2020-12-23 18-41-47

Averaged FTLA Concentration / Size for Experiment:  
16-23SEC Dil in PBS 23.12.20 2020-12-23 18-41-47  
Error bars indicate + / - 1 standard error of the mean

|                                                                                                                                                                                                                                                                                                                                                                                                                                                                                                                                                                                                                                                                                                                                                                                                                                                                                                                                                                                                                                        |                                                                                                                                                                                                                                                                                                                                                                                                                                                                                                   |
|----------------------------------------------------------------------------------------------------------------------------------------------------------------------------------------------------------------------------------------------------------------------------------------------------------------------------------------------------------------------------------------------------------------------------------------------------------------------------------------------------------------------------------------------------------------------------------------------------------------------------------------------------------------------------------------------------------------------------------------------------------------------------------------------------------------------------------------------------------------------------------------------------------------------------------------------------------------------------------------------------------------------------------------|---------------------------------------------------------------------------------------------------------------------------------------------------------------------------------------------------------------------------------------------------------------------------------------------------------------------------------------------------------------------------------------------------------------------------------------------------------------------------------------------------|
| <p><b>Included Files</b></p> <p>16-23SEC Dil in PBS 23.12.20 2020-12-23 18-42-50<br/>16-23SEC Dil in PBS 23.12.20 2020-12-23 18-43-45<br/>16-23SEC Dil in PBS 23.12.20 2020-12-23 18-46-47<br/>16-23SEC Dil in PBS 23.12.20 2020-12-23 18-50-01<br/>16-23SEC Dil in PBS 23.12.20 2020-12-23 18-54-38</p> <p><b>Details</b></p> <p>NTA Version: NTA 3.4 Build 3.4.003<br/>Script Used: SOP Standard Measurement 06-41-47PM 23~<br/>Time Captured: 18:41:47 23/12/2020<br/>Operator: Nadya<br/>Pre-treatment:<br/>Sample Name: 16-23SEC Dil in PBS 23.12.20<br/>Diluent: PBS<br/>Remarks:</p> <p><b>Capture Settings</b></p> <p>Camera Type: sCMOS<br/>Laser Type: Blue488<br/>Camera Level: 16<br/>Slider Shutter: 1300<br/>Slider Gain: 295<br/>FPS: 25.0<br/>Number of Frames: 749<br/>Temperature: 24.5 - 25.0 °C<br/>Viscosity: (Water) 0.888 - 0.900 cP<br/>Dilution factor: Dilution not recorded</p> <p><b>Analysis Settings</b></p> <p>Detect Threshold: 7<br/>Blur Size: Auto<br/>Max Jump Distance: Auto: 14.2 - 19.4 pix</p> | <p><b>Results</b></p> <p>Stats: Merged Data</p> <p>Mean: 110.4 nm<br/>Mode: 59.3 nm<br/>SD: 80.9 nm<br/>D10: 58.7 nm<br/>D50: 93.1 nm<br/>D90: 148.3 nm</p> <p>Stats: Mean +/- Standard Error</p> <p>Mean: 112.7 +/- 16.3 nm<br/>Mode: 75.1 +/- 7.9 nm<br/>SD: 62.6 +/- 24.0 nm<br/>D10: 65.4 +/- 4.6 nm<br/>D50: 95.7 +/- 5.2 nm<br/>D90: 204.5 +/- 76.5 nm</p> <p>Concentration (Upgrade): 1.30e+08 +/- 2.18e+07 particles/ml<br/>9.2 +/- 1.5 particles/frame<br/>9.6 +/- 1.5 centres/frame</p> |
|----------------------------------------------------------------------------------------------------------------------------------------------------------------------------------------------------------------------------------------------------------------------------------------------------------------------------------------------------------------------------------------------------------------------------------------------------------------------------------------------------------------------------------------------------------------------------------------------------------------------------------------------------------------------------------------------------------------------------------------------------------------------------------------------------------------------------------------------------------------------------------------------------------------------------------------------------------------------------------------------------------------------------------------|---------------------------------------------------------------------------------------------------------------------------------------------------------------------------------------------------------------------------------------------------------------------------------------------------------------------------------------------------------------------------------------------------------------------------------------------------------------------------------------------------|

Figure S6: PL, SEC fraction: 5-6

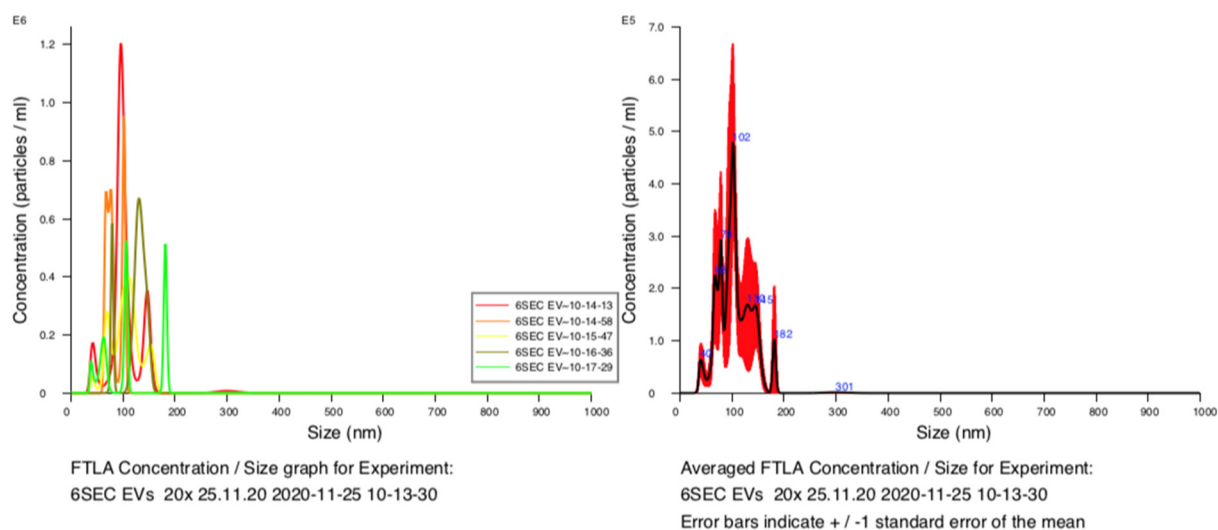

|                                                                                                                                                                                                                                                                                                                                                                                                                                                                                                                                                                                                                                                                                                                                                                                                                                                                                                                                                                                        |                                                                                                                                                                                                                                                                                                                                                                                                                                                                                                                                                                                            |
|----------------------------------------------------------------------------------------------------------------------------------------------------------------------------------------------------------------------------------------------------------------------------------------------------------------------------------------------------------------------------------------------------------------------------------------------------------------------------------------------------------------------------------------------------------------------------------------------------------------------------------------------------------------------------------------------------------------------------------------------------------------------------------------------------------------------------------------------------------------------------------------------------------------------------------------------------------------------------------------|--------------------------------------------------------------------------------------------------------------------------------------------------------------------------------------------------------------------------------------------------------------------------------------------------------------------------------------------------------------------------------------------------------------------------------------------------------------------------------------------------------------------------------------------------------------------------------------------|
| <p><b>Included Files</b></p> <p>6SEC EVs 20x 25.11.20 2020-11-25 10-14-13<br/>6SEC EVs 20x 25.11.20 2020-11-25 10-14-58<br/>6SEC EVs 20x 25.11.20 2020-11-25 10-15-47<br/>6SEC EVs 20x 25.11.20 2020-11-25 10-16-36<br/>6SEC EVs 20x 25.11.20 2020-11-25 10-17-29</p> <p><b>Details</b></p> <p>NTA Version: NTA 3.4 Build 3.4.003<br/>Script Used: SOP Standard Measurement 10-13-30AM 25~<br/>Time Captured: 10:13:30 25/11/2020<br/>Operator: Nadya24.11.20<br/>Pre-treatment:<br/>Sample Name: 6SEC EVs 20x 25.11.20<br/>Diluent: PBS<br/>Remarks:</p> <p><b>Capture Settings</b></p> <p>Camera Type: sCMOS<br/>Laser Type: Blue488<br/>Camera Level: 16<br/>Slider Shutter: 1300<br/>Slider Gain: 295<br/>FPS: 25.0<br/>Number of Frames: 749<br/>Temperature: 22.9 °C<br/>Viscosity: (Water) 0.931 - 0.933 cP<br/>Dilution factor: Dilution not recorded</p> <p><b>Analysis Settings</b></p> <p>Detect Threshold: 5<br/>Blur Size: Auto<br/>Max Jump Distance: Auto: 15.1 pix</p> | <p><b>Results</b></p> <p>Stats: Merged Data</p> <p>Mean: 105.8 nm<br/>Mode: 101.8 nm<br/>SD: 33.4 nm<br/>D10: 67.4 nm<br/>D50: 102.0 nm<br/>D90: 147.4 nm</p> <p>Stats: Mean +/- Standard Error</p> <p>Mean: 106.4 +/- 6.8 nm<br/>Mode: 108.9 +/- 5.9 nm<br/>SD: 30.2 +/- 6.2 nm<br/>D10: 69.1 +/- 4.9 nm<br/>D50: 103.8 +/- 8.3 nm<br/>D90: 145.3 +/- 12.6 nm</p> <p>Concentration (Upgrade): 2.18e+07 +/- 3.43e+06 particles/ml<br/>1.7 +/- 0.2 particles/frame<br/>2.1 +/- 0.3 centres/frame</p> <p>Concentration measurements may be unreliable<br/>See summary file for more info</p> |
|----------------------------------------------------------------------------------------------------------------------------------------------------------------------------------------------------------------------------------------------------------------------------------------------------------------------------------------------------------------------------------------------------------------------------------------------------------------------------------------------------------------------------------------------------------------------------------------------------------------------------------------------------------------------------------------------------------------------------------------------------------------------------------------------------------------------------------------------------------------------------------------------------------------------------------------------------------------------------------------|--------------------------------------------------------------------------------------------------------------------------------------------------------------------------------------------------------------------------------------------------------------------------------------------------------------------------------------------------------------------------------------------------------------------------------------------------------------------------------------------------------------------------------------------------------------------------------------------|

Figure S7: PL, SEC fraction: 7

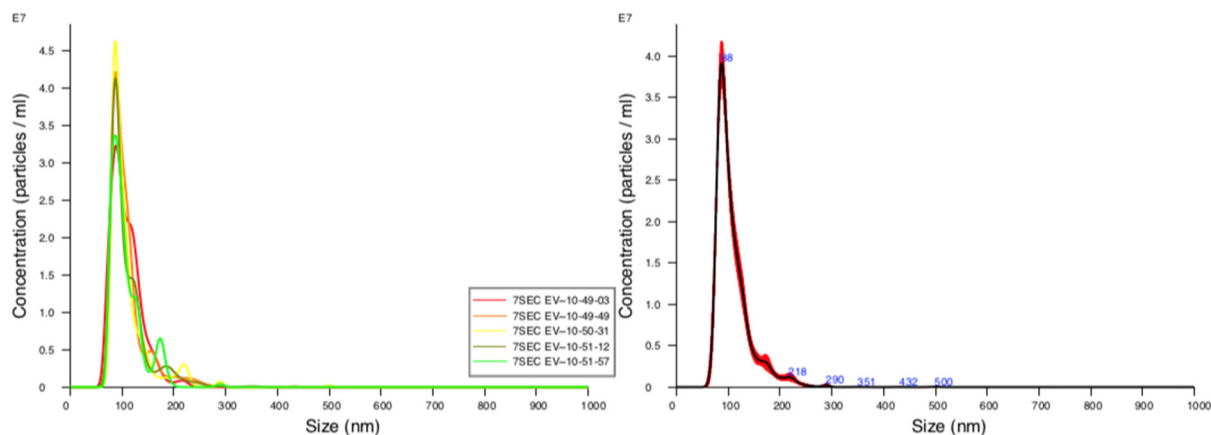

FTLA Concentration / Size graph for Experiment:  
7SEC EVs 20x 25.11.20 2020-11-25 10-48-28

Averaged FTLA Concentration / Size for Experiment:  
7SEC EVs 20x 25.11.20 2020-11-25 10-48-28  
Error bars indicate + / - 1 standard error of the mean

|                                                                                                                                                                                                                                                                                                                                                                                                                                                                                                                                                                                                                                                                                                                                                                                                                                                                                                                                                                                                       |                                                                                                                                                                                                                                                                                                                                                                                                                                                                                                  |
|-------------------------------------------------------------------------------------------------------------------------------------------------------------------------------------------------------------------------------------------------------------------------------------------------------------------------------------------------------------------------------------------------------------------------------------------------------------------------------------------------------------------------------------------------------------------------------------------------------------------------------------------------------------------------------------------------------------------------------------------------------------------------------------------------------------------------------------------------------------------------------------------------------------------------------------------------------------------------------------------------------|--------------------------------------------------------------------------------------------------------------------------------------------------------------------------------------------------------------------------------------------------------------------------------------------------------------------------------------------------------------------------------------------------------------------------------------------------------------------------------------------------|
| <p><b>Included Files</b></p> <p>7SEC EVs 20x 25.11.20 2020-11-25 10-49-03<br/>7SEC EVs 20x 25.11.20 2020-11-25 10-49-49<br/>7SEC EVs 20x 25.11.20 2020-11-25 10-50-31<br/>7SEC EVs 20x 25.11.20 2020-11-25 10-51-12<br/>7SEC EVs 20x 25.11.20 2020-11-25 10-51-57</p> <p><b>Details</b></p> <p>NTA Version: NTA 3.4 Build 3.4.003<br/>Script Used: SOP Standard Measurement 10-48-28AM 25~<br/>Time Captured: 10:48:28 25/11/2020<br/>Operator: Nadya24.11.20<br/>Pre-treatment:<br/>Sample Name: 7SEC EVs 20x 25.11.20<br/>Diluent: PBS<br/>Remarks:</p> <p><b>Capture Settings</b></p> <p>Camera Type: sCMOS<br/>Laser Type: Blue488<br/>Camera Level: 13<br/>Slider Shutter: 1232<br/>Slider Gain: 175<br/>FPS: 25.0<br/>Number of Frames: 749<br/>Temperature: 24.3 - 24.5 °C<br/>Viscosity: (Water) 0.899 - 0.902 cP<br/>Dilution factor: Dilution not recorded</p> <p><b>Analysis Settings</b></p> <p>Detect Threshold: 17<br/>Blur Size: Auto<br/>Max Jump Distance: Auto: 14.8 - 15.1 pix</p> | <p><b>Results</b></p> <p>Stats: Merged Data</p> <p>Mean: 108.8 nm<br/>Mode: 87.2 nm<br/>SD: 35.7 nm<br/>D10: 78.4 nm<br/>D50: 98.5 nm<br/>D90: 151.7 nm</p> <p>Stats: Mean +/- Standard Error</p> <p>Mean: 108.8 +/- 0.6 nm<br/>Mode: 87.3 +/- 0.3 nm<br/>SD: 35.4 +/- 2.3 nm<br/>D10: 78.4 +/- 0.7 nm<br/>D50: 98.6 +/- 0.9 nm<br/>D90: 153.5 +/- 2.3 nm</p> <p>Concentration (Upgrade): 1.75e+09 +/- 5.80e+07 particles/ml<br/>61.9 +/- 2.5 particles/frame<br/>63.0 +/- 2.5 centres/frame</p> |
|-------------------------------------------------------------------------------------------------------------------------------------------------------------------------------------------------------------------------------------------------------------------------------------------------------------------------------------------------------------------------------------------------------------------------------------------------------------------------------------------------------------------------------------------------------------------------------------------------------------------------------------------------------------------------------------------------------------------------------------------------------------------------------------------------------------------------------------------------------------------------------------------------------------------------------------------------------------------------------------------------------|--------------------------------------------------------------------------------------------------------------------------------------------------------------------------------------------------------------------------------------------------------------------------------------------------------------------------------------------------------------------------------------------------------------------------------------------------------------------------------------------------|

Figure S8: PL, SEC fraction: 8

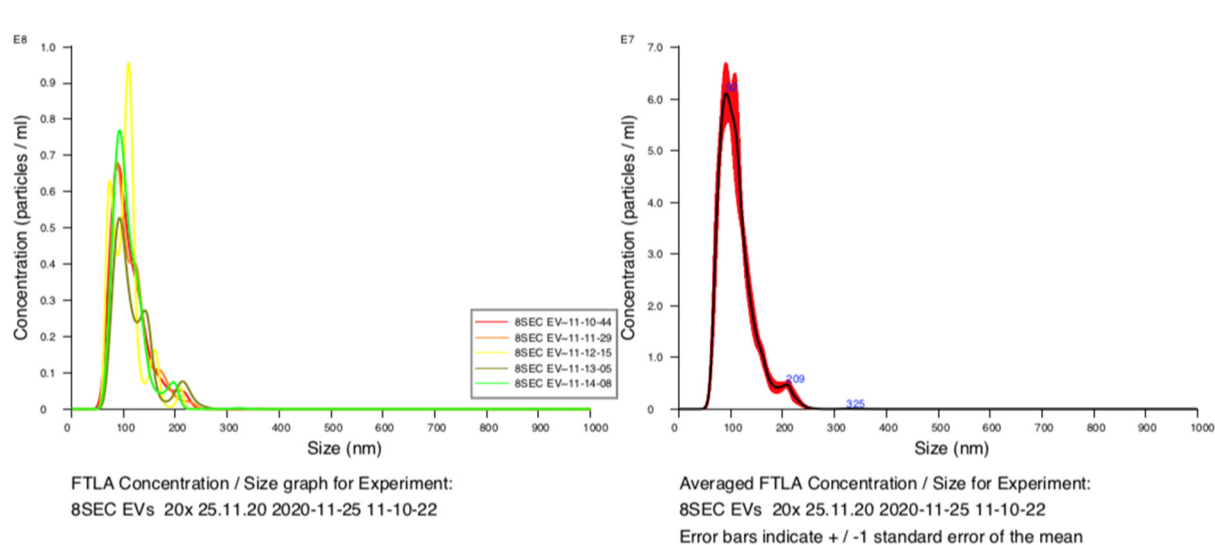

|                                                                                                                                                                                                                                                                                                                                                                                                                                                                                                                                                                                                                                                                                                                                                                                                                                                                                                                                                                                                       |                                                                                                                                                                                                                                                                                                                                                                                                                                                                                                      |
|-------------------------------------------------------------------------------------------------------------------------------------------------------------------------------------------------------------------------------------------------------------------------------------------------------------------------------------------------------------------------------------------------------------------------------------------------------------------------------------------------------------------------------------------------------------------------------------------------------------------------------------------------------------------------------------------------------------------------------------------------------------------------------------------------------------------------------------------------------------------------------------------------------------------------------------------------------------------------------------------------------|------------------------------------------------------------------------------------------------------------------------------------------------------------------------------------------------------------------------------------------------------------------------------------------------------------------------------------------------------------------------------------------------------------------------------------------------------------------------------------------------------|
| <p><b>Included Files</b></p> <p>8SEC EVs 20x 25.11.20 2020-11-25 11-10-44<br/>8SEC EVs 20x 25.11.20 2020-11-25 11-11-29<br/>8SEC EVs 20x 25.11.20 2020-11-25 11-12-15<br/>8SEC EVs 20x 25.11.20 2020-11-25 11-13-05<br/>8SEC EVs 20x 25.11.20 2020-11-25 11-14-08</p> <p><b>Details</b></p> <p>NTA Version: NTA 3.4 Build 3.4.003<br/>Script Used: SOP Standard Measurement 11-10-22AM 25~<br/>Time Captured: 11:10:22 25/11/2020<br/>Operator: Nadya24.11.20<br/>Pre-treatment:<br/>Sample Name: 8SEC EVs 20x 25.11.20<br/>Diluent: PBS<br/>Remarks:</p> <p><b>Capture Settings</b></p> <p>Camera Type: sCMOS<br/>Laser Type: Blue488<br/>Camera Level: 13<br/>Slider Shutter: 1232<br/>Slider Gain: 175<br/>FPS: 25.0<br/>Number of Frames: 749<br/>Temperature: 24.4 - 24.4 °C<br/>Viscosity: (Water) 0.900 - 0.901 cP<br/>Dilution factor: Dilution not recorded</p> <p><b>Analysis Settings</b></p> <p>Detect Threshold: 17<br/>Blur Size: Auto<br/>Max Jump Distance: Auto: 13.9 - 14.9 pix</p> | <p><b>Results</b></p> <p>Stats: Merged Data</p> <p>Mean: 111.2 nm<br/>Mode: 91.3 nm<br/>SD: 34.4 nm<br/>D10: 75.8 nm<br/>D50: 104.0 nm<br/>D90: 156.5 nm</p> <p>Stats: Mean +/- Standard Error</p> <p>Mean: 111.6 +/- 2.4 nm<br/>Mode: 94.2 +/- 4.0 nm<br/>SD: 34.2 +/- 1.9 nm<br/>D10: 76.4 +/- 1.6 nm<br/>D50: 104.4 +/- 1.1 nm<br/>D90: 157.4 +/- 5.1 nm</p> <p>Concentration (Upgrade): 4.03e+09 +/- 1.97e+08 particles/ml<br/>190.3 +/- 6.3 particles/frame<br/>166.7 +/- 4.0 centres/frame</p> |
|-------------------------------------------------------------------------------------------------------------------------------------------------------------------------------------------------------------------------------------------------------------------------------------------------------------------------------------------------------------------------------------------------------------------------------------------------------------------------------------------------------------------------------------------------------------------------------------------------------------------------------------------------------------------------------------------------------------------------------------------------------------------------------------------------------------------------------------------------------------------------------------------------------------------------------------------------------------------------------------------------------|------------------------------------------------------------------------------------------------------------------------------------------------------------------------------------------------------------------------------------------------------------------------------------------------------------------------------------------------------------------------------------------------------------------------------------------------------------------------------------------------------|

Figure S9: PL, SEC fraction: 9

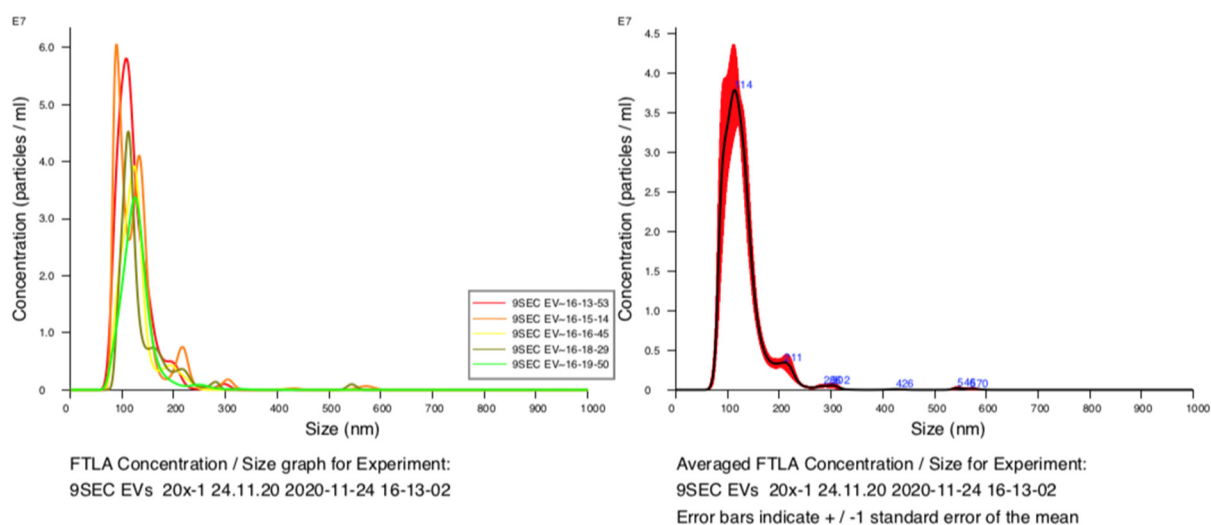

|                                                                                                                                                                                                                                                                                                                                                                                                                                                                                                                                                                                                                                                                                                                                                                                                                                                                                                                                                                                                                    |                                                                                                                                                                                                                                                                                                                                                                                                                                                                                                        |
|--------------------------------------------------------------------------------------------------------------------------------------------------------------------------------------------------------------------------------------------------------------------------------------------------------------------------------------------------------------------------------------------------------------------------------------------------------------------------------------------------------------------------------------------------------------------------------------------------------------------------------------------------------------------------------------------------------------------------------------------------------------------------------------------------------------------------------------------------------------------------------------------------------------------------------------------------------------------------------------------------------------------|--------------------------------------------------------------------------------------------------------------------------------------------------------------------------------------------------------------------------------------------------------------------------------------------------------------------------------------------------------------------------------------------------------------------------------------------------------------------------------------------------------|
| <p><b>Included Files</b></p> <p>9SEC EVs 20x-1 24.11.20 2020-11-24 16-13-53<br/>9SEC EVs 20x-1 24.11.20 2020-11-24 16-15-14<br/>9SEC EVs 20x-1 24.11.20 2020-11-24 16-16-45<br/>9SEC EVs 20x-1 24.11.20 2020-11-24 16-18-29<br/>9SEC EVs 20x-1 24.11.20 2020-11-24 16-19-50</p> <p><b>Details</b></p> <p>NTA Version: NTA 3.4 Build 3.4.003<br/>Script Used: SOP Standard Measurement 04-13-02PM 24~<br/>Time Captured: 16:13:02 24/11/2020<br/>Operator: Nadya24.11.20<br/>Pre-treatment:<br/>Sample Name: 9SEC EVs 20x-1 24.11.20<br/>Diluent: PBS<br/>Remarks:</p> <p><b>Capture Settings</b></p> <p>Camera Type: sCMOS<br/>Laser Type: Blue488<br/>Camera Level: 12<br/>Slider Shutter: 1200<br/>Slider Gain: 125<br/>FPS: 25.0<br/>Number of Frames: 1498<br/>Temperature: 25.0 - 25.1 °C<br/>Viscosity: (Water) 0.886 - 0.889 cP<br/>Dilution factor: Dilution not recorded</p> <p><b>Analysis Settings</b></p> <p>Detect Threshold: 17<br/>Blur Size: Auto<br/>Max Jump Distance: Auto: 13.7 - 14.2 pix</p> | <p><b>Results</b></p> <p>Stats: Merged Data</p> <p>Mean: 127.9 nm<br/>Mode: 113.6 nm<br/>SD: 46.6 nm<br/>D10: 89.6 nm<br/>D50: 118.8 nm<br/>D90: 172.4 nm</p> <p>Stats: Mean +/- Standard Error</p> <p>Mean: 128.7 +/- 2.3 nm<br/>Mode: 111.7 +/- 6.4 nm<br/>SD: 44.3 +/- 6.0 nm<br/>D10: 91.9 +/- 2.1 nm<br/>D50: 119.3 +/- 1.9 nm<br/>D90: 176.2 +/- 6.6 nm</p> <p>Concentration (Upgrade): 2.53e+09 +/- 3.20e+08 particles/ml<br/>89.6 +/- 14.7 particles/frame<br/>89.7 +/- 14.1 centres/frame</p> |
|--------------------------------------------------------------------------------------------------------------------------------------------------------------------------------------------------------------------------------------------------------------------------------------------------------------------------------------------------------------------------------------------------------------------------------------------------------------------------------------------------------------------------------------------------------------------------------------------------------------------------------------------------------------------------------------------------------------------------------------------------------------------------------------------------------------------------------------------------------------------------------------------------------------------------------------------------------------------------------------------------------------------|--------------------------------------------------------------------------------------------------------------------------------------------------------------------------------------------------------------------------------------------------------------------------------------------------------------------------------------------------------------------------------------------------------------------------------------------------------------------------------------------------------|

Figure S10: PL, SEC fraction: 10

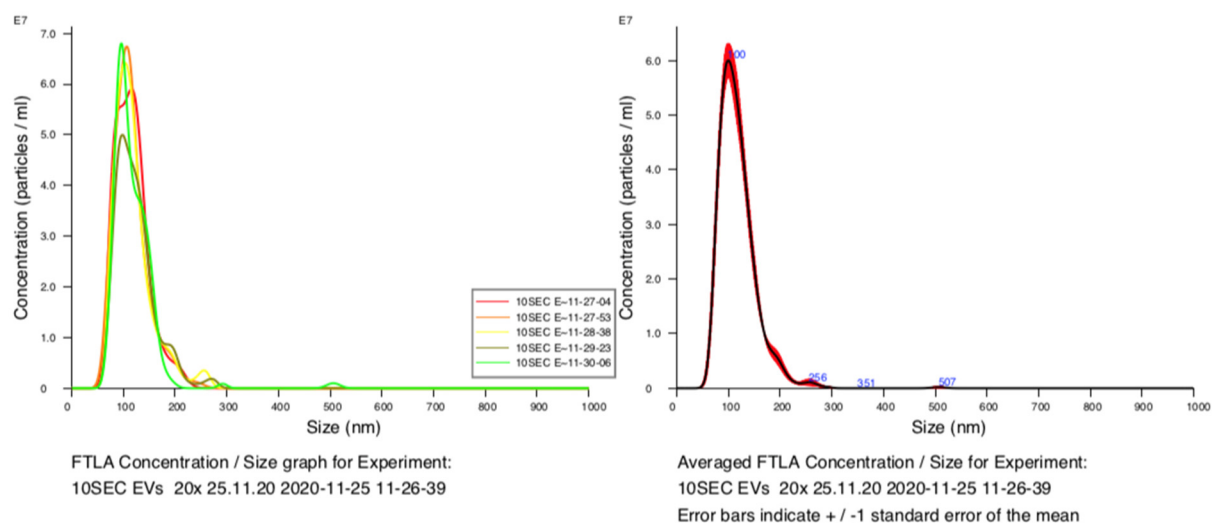

|                                                                                                                                                                                                                                                                                                                                                                                                                                                                                                                                                                                                                                                                                                                                                                                                                                                                                                                                                                                                             |                                                                                                                                                                                                                                                                                                                                                                                                                                                                                                                                                                                                                                                                                                                                                                                                           |       |          |       |         |     |         |      |         |      |          |      |          |       |                  |       |                  |     |                 |      |                 |      |                  |      |                  |
|-------------------------------------------------------------------------------------------------------------------------------------------------------------------------------------------------------------------------------------------------------------------------------------------------------------------------------------------------------------------------------------------------------------------------------------------------------------------------------------------------------------------------------------------------------------------------------------------------------------------------------------------------------------------------------------------------------------------------------------------------------------------------------------------------------------------------------------------------------------------------------------------------------------------------------------------------------------------------------------------------------------|-----------------------------------------------------------------------------------------------------------------------------------------------------------------------------------------------------------------------------------------------------------------------------------------------------------------------------------------------------------------------------------------------------------------------------------------------------------------------------------------------------------------------------------------------------------------------------------------------------------------------------------------------------------------------------------------------------------------------------------------------------------------------------------------------------------|-------|----------|-------|---------|-----|---------|------|---------|------|----------|------|----------|-------|------------------|-------|------------------|-----|-----------------|------|-----------------|------|------------------|------|------------------|
| <p><b>Included Files</b></p> <p>10SEC EVs 20x 25.11.20 2020-11-25 11-27-04<br/>10SEC EVs 20x 25.11.20 2020-11-25 11-27-53<br/>10SEC EVs 20x 25.11.20 2020-11-25 11-28-38<br/>10SEC EVs 20x 25.11.20 2020-11-25 11-29-23<br/>10SEC EVs 20x 25.11.20 2020-11-25 11-30-06</p> <p><b>Details</b></p> <p>NTA Version: NTA 3.4 Build 3.4.003<br/>Script Used: SOP Standard Measurement 11-26-39AM 25~<br/>Time Captured: 11:26:39 25/11/2020<br/>Operator: Nadya24.11.20<br/>Pre-treatment:<br/>Sample Name: 10SEC EVs 20x 25.11.20<br/>Diluent: PBS<br/>Remarks:</p> <p><b>Capture Settings</b></p> <p>Camera Type: sCMOS<br/>Laser Type: Blue488<br/>Camera Level: 12<br/>Slider Shutter: 1200<br/>Slider Gain: 125<br/>FPS: 25.0<br/>Number of Frames: 749<br/>Temperature: 24.3 - 24.3 °C<br/>Viscosity: (Water) 0.902 - 0.904 cP<br/>Dilution factor: Dilution not recorded</p> <p><b>Analysis Settings</b></p> <p>Detect Threshold: 17<br/>Blur Size: Auto<br/>Max Jump Distance: Auto: 14.1 - 14.8 pix</p> | <p><b>Results</b></p> <p>Stats: Merged Data</p> <table> <tr><td>Mean:</td><td>117.9 nm</td></tr> <tr><td>Mode:</td><td>99.7 nm</td></tr> <tr><td>SD:</td><td>38.1 nm</td></tr> <tr><td>D10:</td><td>79.8 nm</td></tr> <tr><td>D50:</td><td>111.4 nm</td></tr> <tr><td>D90:</td><td>161.6 nm</td></tr> </table> <p>Stats: Mean +/- Standard Error</p> <table> <tr><td>Mean:</td><td>118.1 +/- 1.4 nm</td></tr> <tr><td>Mode:</td><td>103.9 +/- 3.5 nm</td></tr> <tr><td>SD:</td><td>37.9 +/- 2.3 nm</td></tr> <tr><td>D10:</td><td>79.9 +/- 0.9 nm</td></tr> <tr><td>D50:</td><td>111.6 +/- 1.2 nm</td></tr> <tr><td>D90:</td><td>163.2 +/- 3.7 nm</td></tr> </table> <p>Concentration (Upgrade): 4.37e+09 +/- 1.42e+08 particles/ml<br/>177.9 +/- 4.9 particles/frame<br/>173.1 +/- 3.9 centres/frame</p> | Mean: | 117.9 nm | Mode: | 99.7 nm | SD: | 38.1 nm | D10: | 79.8 nm | D50: | 111.4 nm | D90: | 161.6 nm | Mean: | 118.1 +/- 1.4 nm | Mode: | 103.9 +/- 3.5 nm | SD: | 37.9 +/- 2.3 nm | D10: | 79.9 +/- 0.9 nm | D50: | 111.6 +/- 1.2 nm | D90: | 163.2 +/- 3.7 nm |
| Mean:                                                                                                                                                                                                                                                                                                                                                                                                                                                                                                                                                                                                                                                                                                                                                                                                                                                                                                                                                                                                       | 117.9 nm                                                                                                                                                                                                                                                                                                                                                                                                                                                                                                                                                                                                                                                                                                                                                                                                  |       |          |       |         |     |         |      |         |      |          |      |          |       |                  |       |                  |     |                 |      |                 |      |                  |      |                  |
| Mode:                                                                                                                                                                                                                                                                                                                                                                                                                                                                                                                                                                                                                                                                                                                                                                                                                                                                                                                                                                                                       | 99.7 nm                                                                                                                                                                                                                                                                                                                                                                                                                                                                                                                                                                                                                                                                                                                                                                                                   |       |          |       |         |     |         |      |         |      |          |      |          |       |                  |       |                  |     |                 |      |                 |      |                  |      |                  |
| SD:                                                                                                                                                                                                                                                                                                                                                                                                                                                                                                                                                                                                                                                                                                                                                                                                                                                                                                                                                                                                         | 38.1 nm                                                                                                                                                                                                                                                                                                                                                                                                                                                                                                                                                                                                                                                                                                                                                                                                   |       |          |       |         |     |         |      |         |      |          |      |          |       |                  |       |                  |     |                 |      |                 |      |                  |      |                  |
| D10:                                                                                                                                                                                                                                                                                                                                                                                                                                                                                                                                                                                                                                                                                                                                                                                                                                                                                                                                                                                                        | 79.8 nm                                                                                                                                                                                                                                                                                                                                                                                                                                                                                                                                                                                                                                                                                                                                                                                                   |       |          |       |         |     |         |      |         |      |          |      |          |       |                  |       |                  |     |                 |      |                 |      |                  |      |                  |
| D50:                                                                                                                                                                                                                                                                                                                                                                                                                                                                                                                                                                                                                                                                                                                                                                                                                                                                                                                                                                                                        | 111.4 nm                                                                                                                                                                                                                                                                                                                                                                                                                                                                                                                                                                                                                                                                                                                                                                                                  |       |          |       |         |     |         |      |         |      |          |      |          |       |                  |       |                  |     |                 |      |                 |      |                  |      |                  |
| D90:                                                                                                                                                                                                                                                                                                                                                                                                                                                                                                                                                                                                                                                                                                                                                                                                                                                                                                                                                                                                        | 161.6 nm                                                                                                                                                                                                                                                                                                                                                                                                                                                                                                                                                                                                                                                                                                                                                                                                  |       |          |       |         |     |         |      |         |      |          |      |          |       |                  |       |                  |     |                 |      |                 |      |                  |      |                  |
| Mean:                                                                                                                                                                                                                                                                                                                                                                                                                                                                                                                                                                                                                                                                                                                                                                                                                                                                                                                                                                                                       | 118.1 +/- 1.4 nm                                                                                                                                                                                                                                                                                                                                                                                                                                                                                                                                                                                                                                                                                                                                                                                          |       |          |       |         |     |         |      |         |      |          |      |          |       |                  |       |                  |     |                 |      |                 |      |                  |      |                  |
| Mode:                                                                                                                                                                                                                                                                                                                                                                                                                                                                                                                                                                                                                                                                                                                                                                                                                                                                                                                                                                                                       | 103.9 +/- 3.5 nm                                                                                                                                                                                                                                                                                                                                                                                                                                                                                                                                                                                                                                                                                                                                                                                          |       |          |       |         |     |         |      |         |      |          |      |          |       |                  |       |                  |     |                 |      |                 |      |                  |      |                  |
| SD:                                                                                                                                                                                                                                                                                                                                                                                                                                                                                                                                                                                                                                                                                                                                                                                                                                                                                                                                                                                                         | 37.9 +/- 2.3 nm                                                                                                                                                                                                                                                                                                                                                                                                                                                                                                                                                                                                                                                                                                                                                                                           |       |          |       |         |     |         |      |         |      |          |      |          |       |                  |       |                  |     |                 |      |                 |      |                  |      |                  |
| D10:                                                                                                                                                                                                                                                                                                                                                                                                                                                                                                                                                                                                                                                                                                                                                                                                                                                                                                                                                                                                        | 79.9 +/- 0.9 nm                                                                                                                                                                                                                                                                                                                                                                                                                                                                                                                                                                                                                                                                                                                                                                                           |       |          |       |         |     |         |      |         |      |          |      |          |       |                  |       |                  |     |                 |      |                 |      |                  |      |                  |
| D50:                                                                                                                                                                                                                                                                                                                                                                                                                                                                                                                                                                                                                                                                                                                                                                                                                                                                                                                                                                                                        | 111.6 +/- 1.2 nm                                                                                                                                                                                                                                                                                                                                                                                                                                                                                                                                                                                                                                                                                                                                                                                          |       |          |       |         |     |         |      |         |      |          |      |          |       |                  |       |                  |     |                 |      |                 |      |                  |      |                  |
| D90:                                                                                                                                                                                                                                                                                                                                                                                                                                                                                                                                                                                                                                                                                                                                                                                                                                                                                                                                                                                                        | 163.2 +/- 3.7 nm                                                                                                                                                                                                                                                                                                                                                                                                                                                                                                                                                                                                                                                                                                                                                                                          |       |          |       |         |     |         |      |         |      |          |      |          |       |                  |       |                  |     |                 |      |                 |      |                  |      |                  |



Figure S11: PL, SEC fraction: 11

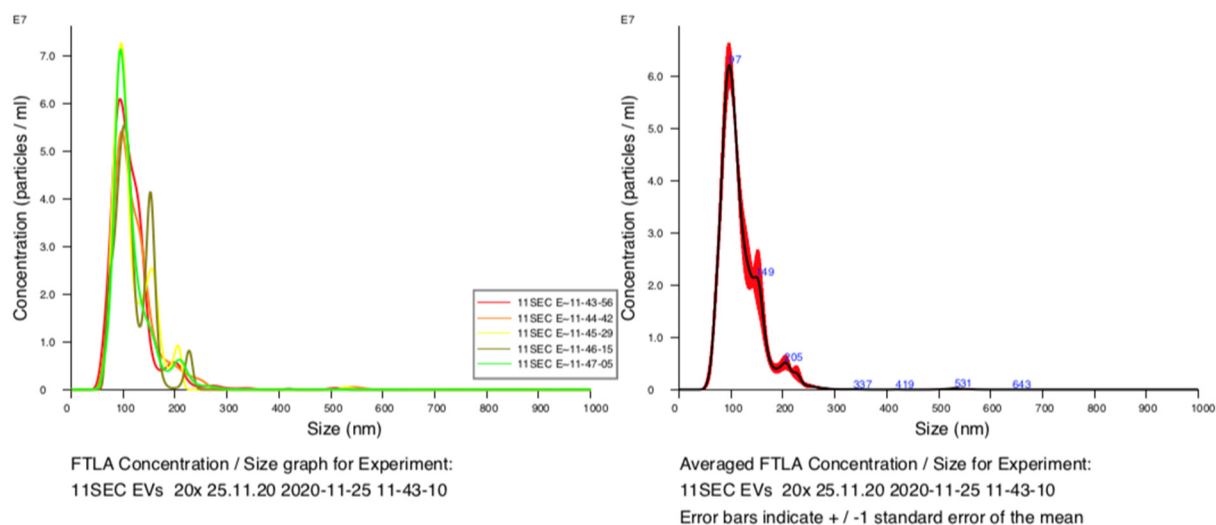

|                                                                                                                                                                                                                                                                                                                                                                                                                                                                                                                                                                                                                                                                                                                                                                                                                                                                                                                                                                                                             |                                                                                                                                                                                                                                                                                                                                                                                                                                                                                                      |
|-------------------------------------------------------------------------------------------------------------------------------------------------------------------------------------------------------------------------------------------------------------------------------------------------------------------------------------------------------------------------------------------------------------------------------------------------------------------------------------------------------------------------------------------------------------------------------------------------------------------------------------------------------------------------------------------------------------------------------------------------------------------------------------------------------------------------------------------------------------------------------------------------------------------------------------------------------------------------------------------------------------|------------------------------------------------------------------------------------------------------------------------------------------------------------------------------------------------------------------------------------------------------------------------------------------------------------------------------------------------------------------------------------------------------------------------------------------------------------------------------------------------------|
| <p><b>Included Files</b></p> <p>11SEC EVs 20x 25.11.20 2020-11-25 11-43-56<br/>11SEC EVs 20x 25.11.20 2020-11-25 11-44-42<br/>11SEC EVs 20x 25.11.20 2020-11-25 11-45-29<br/>11SEC EVs 20x 25.11.20 2020-11-25 11-46-15<br/>11SEC EVs 20x 25.11.20 2020-11-25 11-47-05</p> <p><b>Details</b></p> <p>NTA Version: NTA 3.4 Build 3.4.003<br/>Script Used: SOP Standard Measurement 11-43-10AM 25~<br/>Time Captured: 11:43:10 25/11/2020<br/>Operator: Nadya24.11.20<br/>Pre-treatment:<br/>Sample Name: 11SEC EVs 20x 25.11.20<br/>Diluent: PBS<br/>Remarks:</p> <p><b>Capture Settings</b></p> <p>Camera Type: sCMOS<br/>Laser Type: Blue488<br/>Camera Level: 12<br/>Slider Shutter: 1200<br/>Slider Gain: 125<br/>FPS: 25.0<br/>Number of Frames: 749<br/>Temperature: 24.3 - 24.4 °C<br/>Viscosity: (Water) 0.901 - 0.904 cP<br/>Dilution factor: Dilution not recorded</p> <p><b>Analysis Settings</b></p> <p>Detect Threshold: 17<br/>Blur Size: Auto<br/>Max Jump Distance: Auto: 14.2 - 14.7 pix</p> | <p><b>Results</b></p> <p>Stats: Merged Data</p> <p>Mean: 118.1 nm<br/>Mode: 96.6 nm<br/>SD: 43.4 nm<br/>D10: 79.6 nm<br/>D50: 107.4 nm<br/>D90: 164.3 nm</p> <p>Stats: Mean +/- Standard Error</p> <p>Mean: 118.1 +/- 1.3 nm<br/>Mode: 97.0 +/- 1.5 nm<br/>SD: 42.9 +/- 2.7 nm<br/>D10: 79.7 +/- 0.8 nm<br/>D50: 107.6 +/- 1.4 nm<br/>D90: 164.5 +/- 3.1 nm</p> <p>Concentration (Upgrade): 3.79e+09 +/- 1.04e+08 particles/ml<br/>148.8 +/- 6.4 particles/frame<br/>152.7 +/- 6.1 centres/frame</p> |
|-------------------------------------------------------------------------------------------------------------------------------------------------------------------------------------------------------------------------------------------------------------------------------------------------------------------------------------------------------------------------------------------------------------------------------------------------------------------------------------------------------------------------------------------------------------------------------------------------------------------------------------------------------------------------------------------------------------------------------------------------------------------------------------------------------------------------------------------------------------------------------------------------------------------------------------------------------------------------------------------------------------|------------------------------------------------------------------------------------------------------------------------------------------------------------------------------------------------------------------------------------------------------------------------------------------------------------------------------------------------------------------------------------------------------------------------------------------------------------------------------------------------------|



Figure S12: PL, SEC fraction: 12

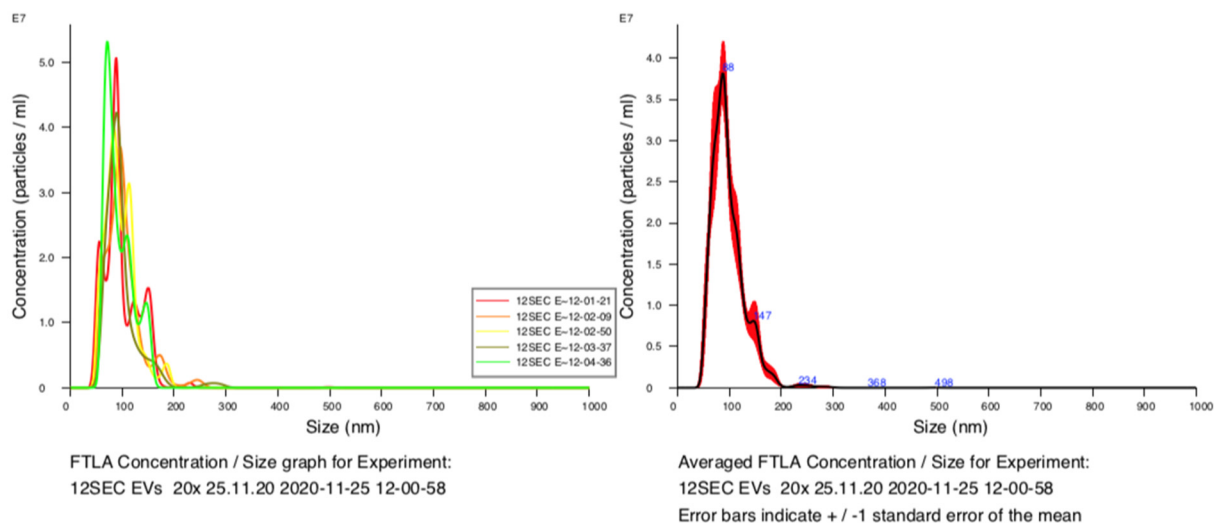

|                                                                                                                                                                                                                                                                                                                                                                                                                                                                                                                                                                                                                                                                                                                                                                                                                                                                                                                                                                                                             |                                                                                                                                                                                                                                                                                                                                                                                                                                                                                                                                                                                               |
|-------------------------------------------------------------------------------------------------------------------------------------------------------------------------------------------------------------------------------------------------------------------------------------------------------------------------------------------------------------------------------------------------------------------------------------------------------------------------------------------------------------------------------------------------------------------------------------------------------------------------------------------------------------------------------------------------------------------------------------------------------------------------------------------------------------------------------------------------------------------------------------------------------------------------------------------------------------------------------------------------------------|-----------------------------------------------------------------------------------------------------------------------------------------------------------------------------------------------------------------------------------------------------------------------------------------------------------------------------------------------------------------------------------------------------------------------------------------------------------------------------------------------------------------------------------------------------------------------------------------------|
| <p><b>Included Files</b></p> <p>12SEC EVs 20x 25.11.20 2020-11-25 12-01-21<br/>12SEC EVs 20x 25.11.20 2020-11-25 12-02-09<br/>12SEC EVs 20x 25.11.20 2020-11-25 12-02-50<br/>12SEC EVs 20x 25.11.20 2020-11-25 12-03-37<br/>12SEC EVs 20x 25.11.20 2020-11-25 12-04-36</p> <p><b>Details</b></p> <p>NTA Version: NTA 3.4 Build 3.4.003<br/>Script Used: SOP Standard Measurement 12-00-58PM 25~<br/>Time Captured: 12:00:58 25/11/2020<br/>Operator: Nadya24.11.20<br/>Pre-treatment:<br/>Sample Name: 12SEC EVs 20x 25.11.20<br/>Diluent: PBS<br/>Remarks:</p> <p><b>Capture Settings</b></p> <p>Camera Type: sCMOS<br/>Laser Type: Blue488<br/>Camera Level: 13<br/>Slider Shutter: 1232<br/>Slider Gain: 175<br/>FPS: 25.0<br/>Number of Frames: 749<br/>Temperature: 24.2 - 24.3 °C<br/>Viscosity: (Water) 0.902 - 0.905 cP<br/>Dilution factor: Dilution not recorded</p> <p><b>Analysis Settings</b></p> <p>Detect Threshold: 17<br/>Blur Size: Auto<br/>Max Jump Distance: Auto: 15.9 - 16.5 pix</p> | <p><b>Results</b></p> <p>Stats: Merged Data<br/>Mean: 97.7 nm<br/>Mode: 87.3 nm<br/>SD: 32.8 nm<br/>D10: 63.6 nm<br/>D50: 91.1 nm<br/>D90: 141.6 nm</p> <p>Stats: Mean +/- Standard Error<br/>Mean: 97.8 +/- 1.4 nm<br/>Mode: 85.7 +/- 4.0 nm<br/>SD: 32.6 +/- 1.9 nm<br/>D10: 63.4 +/- 1.7 nm<br/>D50: 90.9 +/- 1.6 nm<br/>D90: 141.0 +/- 3.4 nm<br/>Concentration (Upgrade): 2.23e+09 +/- 7.61e+07 particles/ml<br/>66.5 +/- 2.6 particles/frame<br/>83.2 +/- 3.1 centres/frame<br/>Concentration measurements may require some caution due to noise<br/>See summary file for more info</p> |
|-------------------------------------------------------------------------------------------------------------------------------------------------------------------------------------------------------------------------------------------------------------------------------------------------------------------------------------------------------------------------------------------------------------------------------------------------------------------------------------------------------------------------------------------------------------------------------------------------------------------------------------------------------------------------------------------------------------------------------------------------------------------------------------------------------------------------------------------------------------------------------------------------------------------------------------------------------------------------------------------------------------|-----------------------------------------------------------------------------------------------------------------------------------------------------------------------------------------------------------------------------------------------------------------------------------------------------------------------------------------------------------------------------------------------------------------------------------------------------------------------------------------------------------------------------------------------------------------------------------------------|

Figure S13: PL, SEC fraction: 13

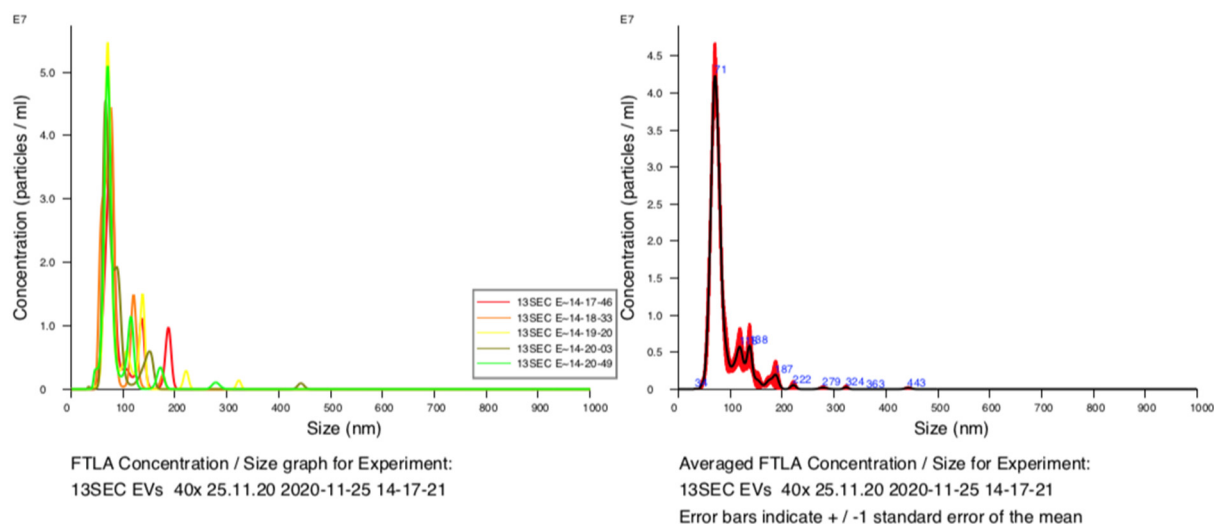

|                                                                                                                                                                                                                                                                                                                                                                                                                                                                                                                                                                                                                                                                                                                                                                                                                                                                                                                                                                                                             |                                                                                                                                                                                                                                                                                                                                                                                                                                                                                                                                                                                                                                                                                                                                                                                                     |       |         |       |         |     |         |      |         |      |         |      |          |       |                 |       |                 |     |                 |      |                 |      |                 |      |                   |
|-------------------------------------------------------------------------------------------------------------------------------------------------------------------------------------------------------------------------------------------------------------------------------------------------------------------------------------------------------------------------------------------------------------------------------------------------------------------------------------------------------------------------------------------------------------------------------------------------------------------------------------------------------------------------------------------------------------------------------------------------------------------------------------------------------------------------------------------------------------------------------------------------------------------------------------------------------------------------------------------------------------|-----------------------------------------------------------------------------------------------------------------------------------------------------------------------------------------------------------------------------------------------------------------------------------------------------------------------------------------------------------------------------------------------------------------------------------------------------------------------------------------------------------------------------------------------------------------------------------------------------------------------------------------------------------------------------------------------------------------------------------------------------------------------------------------------------|-------|---------|-------|---------|-----|---------|------|---------|------|---------|------|----------|-------|-----------------|-------|-----------------|-----|-----------------|------|-----------------|------|-----------------|------|-------------------|
| <p><b>Included Files</b></p> <p>13SEC EVs 40x 25.11.20 2020-11-25 14-17-46<br/>13SEC EVs 40x 25.11.20 2020-11-25 14-18-33<br/>13SEC EVs 40x 25.11.20 2020-11-25 14-19-20<br/>13SEC EVs 40x 25.11.20 2020-11-25 14-20-03<br/>13SEC EVs 40x 25.11.20 2020-11-25 14-20-49</p> <p><b>Details</b></p> <p>NTA Version: NTA 3.4 Build 3.4.003<br/>Script Used: SOP Standard Measurement 02-17-21PM 25~<br/>Time Captured: 14:17:21 25/11/2020<br/>Operator: Nadya24.11.20<br/>Pre-treatment:<br/>Sample Name: 13SEC EVs 40x 25.11.20<br/>Diluent: PBS<br/>Remarks:</p> <p><b>Capture Settings</b></p> <p>Camera Type: sCMOS<br/>Laser Type: Blue488<br/>Camera Level: 14<br/>Slider Shutter: 1259<br/>Slider Gain: 245<br/>FPS: 25.0<br/>Number of Frames: 749<br/>Temperature: 24.4 - 24.6 °C<br/>Viscosity: (Water) 0.897 - 0.900 cP<br/>Dilution factor: Dilution not recorded</p> <p><b>Analysis Settings</b></p> <p>Detect Threshold: 17<br/>Blur Size: Auto<br/>Max Jump Distance: Auto: 16.2 - 17.4 pix</p> | <p><b>Results</b></p> <p>Stats: Merged Data</p> <table> <tr><td>Mean:</td><td>88.5 nm</td></tr> <tr><td>Mode:</td><td>70.6 nm</td></tr> <tr><td>SD:</td><td>38.9 nm</td></tr> <tr><td>D10:</td><td>61.7 nm</td></tr> <tr><td>D50:</td><td>75.1 nm</td></tr> <tr><td>D90:</td><td>135.7 nm</td></tr> </table> <p>Stats: Mean +/- Standard Error</p> <table> <tr><td>Mean:</td><td>88.7 +/- 3.0 nm</td></tr> <tr><td>Mode:</td><td>71.8 +/- 1.9 nm</td></tr> <tr><td>SD:</td><td>38.0 +/- 3.7 nm</td></tr> <tr><td>D10:</td><td>62.1 +/- 1.3 nm</td></tr> <tr><td>D50:</td><td>75.2 +/- 1.2 nm</td></tr> <tr><td>D90:</td><td>139.5 +/- 11.1 nm</td></tr> </table> <p>Concentration (Upgrade): 1.23e+09 +/- 3.86e+07 particles/ml<br/>34.8 +/- 2.1 particles/frame<br/>40.4 +/- 2.3 centres/frame</p> | Mean: | 88.5 nm | Mode: | 70.6 nm | SD: | 38.9 nm | D10: | 61.7 nm | D50: | 75.1 nm | D90: | 135.7 nm | Mean: | 88.7 +/- 3.0 nm | Mode: | 71.8 +/- 1.9 nm | SD: | 38.0 +/- 3.7 nm | D10: | 62.1 +/- 1.3 nm | D50: | 75.2 +/- 1.2 nm | D90: | 139.5 +/- 11.1 nm |
| Mean:                                                                                                                                                                                                                                                                                                                                                                                                                                                                                                                                                                                                                                                                                                                                                                                                                                                                                                                                                                                                       | 88.5 nm                                                                                                                                                                                                                                                                                                                                                                                                                                                                                                                                                                                                                                                                                                                                                                                             |       |         |       |         |     |         |      |         |      |         |      |          |       |                 |       |                 |     |                 |      |                 |      |                 |      |                   |
| Mode:                                                                                                                                                                                                                                                                                                                                                                                                                                                                                                                                                                                                                                                                                                                                                                                                                                                                                                                                                                                                       | 70.6 nm                                                                                                                                                                                                                                                                                                                                                                                                                                                                                                                                                                                                                                                                                                                                                                                             |       |         |       |         |     |         |      |         |      |         |      |          |       |                 |       |                 |     |                 |      |                 |      |                 |      |                   |
| SD:                                                                                                                                                                                                                                                                                                                                                                                                                                                                                                                                                                                                                                                                                                                                                                                                                                                                                                                                                                                                         | 38.9 nm                                                                                                                                                                                                                                                                                                                                                                                                                                                                                                                                                                                                                                                                                                                                                                                             |       |         |       |         |     |         |      |         |      |         |      |          |       |                 |       |                 |     |                 |      |                 |      |                 |      |                   |
| D10:                                                                                                                                                                                                                                                                                                                                                                                                                                                                                                                                                                                                                                                                                                                                                                                                                                                                                                                                                                                                        | 61.7 nm                                                                                                                                                                                                                                                                                                                                                                                                                                                                                                                                                                                                                                                                                                                                                                                             |       |         |       |         |     |         |      |         |      |         |      |          |       |                 |       |                 |     |                 |      |                 |      |                 |      |                   |
| D50:                                                                                                                                                                                                                                                                                                                                                                                                                                                                                                                                                                                                                                                                                                                                                                                                                                                                                                                                                                                                        | 75.1 nm                                                                                                                                                                                                                                                                                                                                                                                                                                                                                                                                                                                                                                                                                                                                                                                             |       |         |       |         |     |         |      |         |      |         |      |          |       |                 |       |                 |     |                 |      |                 |      |                 |      |                   |
| D90:                                                                                                                                                                                                                                                                                                                                                                                                                                                                                                                                                                                                                                                                                                                                                                                                                                                                                                                                                                                                        | 135.7 nm                                                                                                                                                                                                                                                                                                                                                                                                                                                                                                                                                                                                                                                                                                                                                                                            |       |         |       |         |     |         |      |         |      |         |      |          |       |                 |       |                 |     |                 |      |                 |      |                 |      |                   |
| Mean:                                                                                                                                                                                                                                                                                                                                                                                                                                                                                                                                                                                                                                                                                                                                                                                                                                                                                                                                                                                                       | 88.7 +/- 3.0 nm                                                                                                                                                                                                                                                                                                                                                                                                                                                                                                                                                                                                                                                                                                                                                                                     |       |         |       |         |     |         |      |         |      |         |      |          |       |                 |       |                 |     |                 |      |                 |      |                 |      |                   |
| Mode:                                                                                                                                                                                                                                                                                                                                                                                                                                                                                                                                                                                                                                                                                                                                                                                                                                                                                                                                                                                                       | 71.8 +/- 1.9 nm                                                                                                                                                                                                                                                                                                                                                                                                                                                                                                                                                                                                                                                                                                                                                                                     |       |         |       |         |     |         |      |         |      |         |      |          |       |                 |       |                 |     |                 |      |                 |      |                 |      |                   |
| SD:                                                                                                                                                                                                                                                                                                                                                                                                                                                                                                                                                                                                                                                                                                                                                                                                                                                                                                                                                                                                         | 38.0 +/- 3.7 nm                                                                                                                                                                                                                                                                                                                                                                                                                                                                                                                                                                                                                                                                                                                                                                                     |       |         |       |         |     |         |      |         |      |         |      |          |       |                 |       |                 |     |                 |      |                 |      |                 |      |                   |
| D10:                                                                                                                                                                                                                                                                                                                                                                                                                                                                                                                                                                                                                                                                                                                                                                                                                                                                                                                                                                                                        | 62.1 +/- 1.3 nm                                                                                                                                                                                                                                                                                                                                                                                                                                                                                                                                                                                                                                                                                                                                                                                     |       |         |       |         |     |         |      |         |      |         |      |          |       |                 |       |                 |     |                 |      |                 |      |                 |      |                   |
| D50:                                                                                                                                                                                                                                                                                                                                                                                                                                                                                                                                                                                                                                                                                                                                                                                                                                                                                                                                                                                                        | 75.2 +/- 1.2 nm                                                                                                                                                                                                                                                                                                                                                                                                                                                                                                                                                                                                                                                                                                                                                                                     |       |         |       |         |     |         |      |         |      |         |      |          |       |                 |       |                 |     |                 |      |                 |      |                 |      |                   |
| D90:                                                                                                                                                                                                                                                                                                                                                                                                                                                                                                                                                                                                                                                                                                                                                                                                                                                                                                                                                                                                        | 139.5 +/- 11.1 nm                                                                                                                                                                                                                                                                                                                                                                                                                                                                                                                                                                                                                                                                                                                                                                                   |       |         |       |         |     |         |      |         |      |         |      |          |       |                 |       |                 |     |                 |      |                 |      |                 |      |                   |

Figure S14: PL, SEC fraction: 14

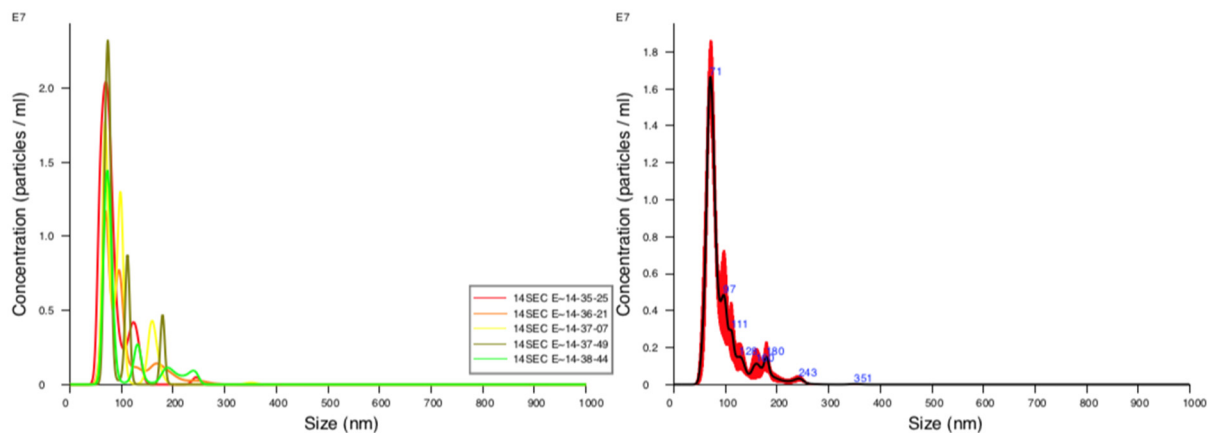

FTLA Concentration / Size graph for Experiment:  
14SEC EVs 40x 25.11.20 2020-11-25 14-34-31

Averaged FTLA Concentration / Size for Experiment:  
14SEC EVs 40x 25.11.20 2020-11-25 14-34-31  
Error bars indicate + / -1 standard error of the mean

|                                                                                                                                                                                                                                                                                                                                                                                                                                                                                                                                                                                                                                                                                                                                                                                                                                                                                                                                                                                                      |                                                                                                                                                                                                                                                                                                                                                                                                                                                                                                 |
|------------------------------------------------------------------------------------------------------------------------------------------------------------------------------------------------------------------------------------------------------------------------------------------------------------------------------------------------------------------------------------------------------------------------------------------------------------------------------------------------------------------------------------------------------------------------------------------------------------------------------------------------------------------------------------------------------------------------------------------------------------------------------------------------------------------------------------------------------------------------------------------------------------------------------------------------------------------------------------------------------|-------------------------------------------------------------------------------------------------------------------------------------------------------------------------------------------------------------------------------------------------------------------------------------------------------------------------------------------------------------------------------------------------------------------------------------------------------------------------------------------------|
| <p><b>Included Files</b></p> <p>14SEC EVs 40x 25.11.20 2020-11-25 14-35-25<br/>14SEC EVs 40x 25.11.20 2020-11-25 14-36-21<br/>14SEC EVs 40x 25.11.20 2020-11-25 14-37-07<br/>14SEC EVs 40x 25.11.20 2020-11-25 14-37-49<br/>14SEC EVs 40x 25.11.20 2020-11-25 14-38-44</p> <p><b>Details</b></p> <p>NTA Version: NTA 3.4 Build 3.4.003<br/>Script Used: SOP Standard Measurement 02-34-31PM 25~<br/>Time Captured: 14:34:31 25/11/2020<br/>Operator: Nadya24.11.20<br/>Pre-treatment:<br/>Sample Name: 14SEC EVs 40x 25.11.20<br/>Diluent: PBS<br/>Remarks:</p> <p><b>Capture Settings</b></p> <p>Camera Type: sCMOS<br/>Laser Type: Blue488<br/>Camera Level: 14<br/>Slider Shutter: 1259<br/>Slider Gain: 245<br/>FPS: 25.0<br/>Number of Frames: 749<br/>Temperature: 24.8 °C<br/>Viscosity: (Water) 0.891 - 0.893 cP<br/>Dilution factor: Dilution not recorded</p> <p><b>Analysis Settings</b></p> <p>Detect Threshold: 17<br/>Blur Size: Auto<br/>Max Jump Distance: Auto: 15.8 - 17.9 pix</p> | <p><b>Results</b></p> <p>Stats: Merged Data</p> <p>Mean: 93.8 nm<br/>Mode: 70.7 nm<br/>SD: 39.9 nm<br/>D10: 63.0 nm<br/>D50: 78.3 nm<br/>D90: 156.0 nm</p> <p>Stats: Mean +/- Standard Error</p> <p>Mean: 95.3 +/- 4.1 nm<br/>Mode: 70.5 +/- 1.0 nm<br/>SD: 39.6 +/- 4.2 nm<br/>D10: 63.8 +/- 1.6 nm<br/>D50: 81.0 +/- 3.1 nm<br/>D90: 164.7 +/- 12.7 nm</p> <p>Concentration (Upgrade): 5.53e+08 +/- 6.03e+07 particles/ml<br/>17.0 +/- 1.1 particles/frame<br/>19.4 +/- 1.2 centres/frame</p> |
|------------------------------------------------------------------------------------------------------------------------------------------------------------------------------------------------------------------------------------------------------------------------------------------------------------------------------------------------------------------------------------------------------------------------------------------------------------------------------------------------------------------------------------------------------------------------------------------------------------------------------------------------------------------------------------------------------------------------------------------------------------------------------------------------------------------------------------------------------------------------------------------------------------------------------------------------------------------------------------------------------|-------------------------------------------------------------------------------------------------------------------------------------------------------------------------------------------------------------------------------------------------------------------------------------------------------------------------------------------------------------------------------------------------------------------------------------------------------------------------------------------------|

Figure S15: PL, SEC fraction: 15

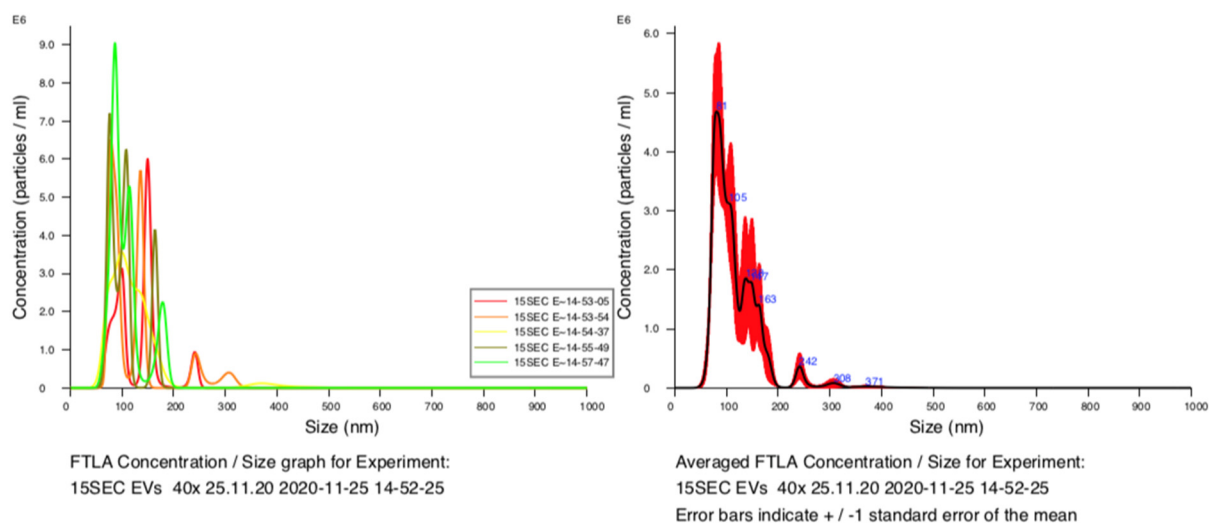

|                                                                                                                                                                                                                                                                                                                                                                                                                                                                                                                                                                                                                                                                                                                                                                                                                                                                                                                                                                                                             |                                                                                                                                                                                                                                                                                                                                                                                                                                                                                                  |
|-------------------------------------------------------------------------------------------------------------------------------------------------------------------------------------------------------------------------------------------------------------------------------------------------------------------------------------------------------------------------------------------------------------------------------------------------------------------------------------------------------------------------------------------------------------------------------------------------------------------------------------------------------------------------------------------------------------------------------------------------------------------------------------------------------------------------------------------------------------------------------------------------------------------------------------------------------------------------------------------------------------|--------------------------------------------------------------------------------------------------------------------------------------------------------------------------------------------------------------------------------------------------------------------------------------------------------------------------------------------------------------------------------------------------------------------------------------------------------------------------------------------------|
| <p><b>Included Files</b></p> <p>15SEC EVs 40x 25.11.20 2020-11-25 14-53-05<br/>15SEC EVs 40x 25.11.20 2020-11-25 14-53-54<br/>15SEC EVs 40x 25.11.20 2020-11-25 14-54-37<br/>15SEC EVs 40x 25.11.20 2020-11-25 14-55-49<br/>15SEC EVs 40x 25.11.20 2020-11-25 14-57-47</p> <p><b>Details</b></p> <p>NTA Version: NTA 3.4 Build 3.4.003<br/>Script Used: SOP Standard Measurement 02-52-25PM 25~<br/>Time Captured: 14:52:25 25/11/2020<br/>Operator: Nadya24.11.20<br/>Pre-treatment:<br/>Sample Name: 15SEC EVs 40x 25.11.20<br/>Diluent: PBS<br/>Remarks:</p> <p><b>Capture Settings</b></p> <p>Camera Type: sCMOS<br/>Laser Type: Blue488<br/>Camera Level: 13<br/>Slider Shutter: 1232<br/>Slider Gain: 175<br/>FPS: 25.0<br/>Number of Frames: 749<br/>Temperature: 24.4 - 24.7 °C<br/>Viscosity: (Water) 0.895 - 0.901 cP<br/>Dilution factor: Dilution not recorded</p> <p><b>Analysis Settings</b></p> <p>Detect Threshold: 17<br/>Blur Size: Auto<br/>Max Jump Distance: Auto: 14.4 - 16.1 pix</p> | <p><b>Results</b></p> <p>Stats: Merged Data</p> <p>Mean: 116.7 nm<br/>Mode: 80.6 nm<br/>SD: 48.4 nm<br/>D10: 74.7 nm<br/>D50: 103.6 nm<br/>D90: 166.0 nm</p> <p>Stats: Mean +/- Standard Error</p> <p>Mean: 117.8 +/- 4.8 nm<br/>Mode: 98.0 +/- 13.5 nm<br/>SD: 46.1 +/- 6.4 nm<br/>D10: 75.2 +/- 1.1 nm<br/>D50: 109.4 +/- 8.4 nm<br/>D90: 180.5 +/- 15.1 nm<br/>Concentration (Upgrade): 2.90e+08 +/- 2.31e+07 particles/ml<br/>9.7 +/- 0.4 particles/frame<br/>10.6 +/- 0.4 centres/frame</p> |
|-------------------------------------------------------------------------------------------------------------------------------------------------------------------------------------------------------------------------------------------------------------------------------------------------------------------------------------------------------------------------------------------------------------------------------------------------------------------------------------------------------------------------------------------------------------------------------------------------------------------------------------------------------------------------------------------------------------------------------------------------------------------------------------------------------------------------------------------------------------------------------------------------------------------------------------------------------------------------------------------------------------|--------------------------------------------------------------------------------------------------------------------------------------------------------------------------------------------------------------------------------------------------------------------------------------------------------------------------------------------------------------------------------------------------------------------------------------------------------------------------------------------------|

Figure S16: PL, SEC fraction: 16-21

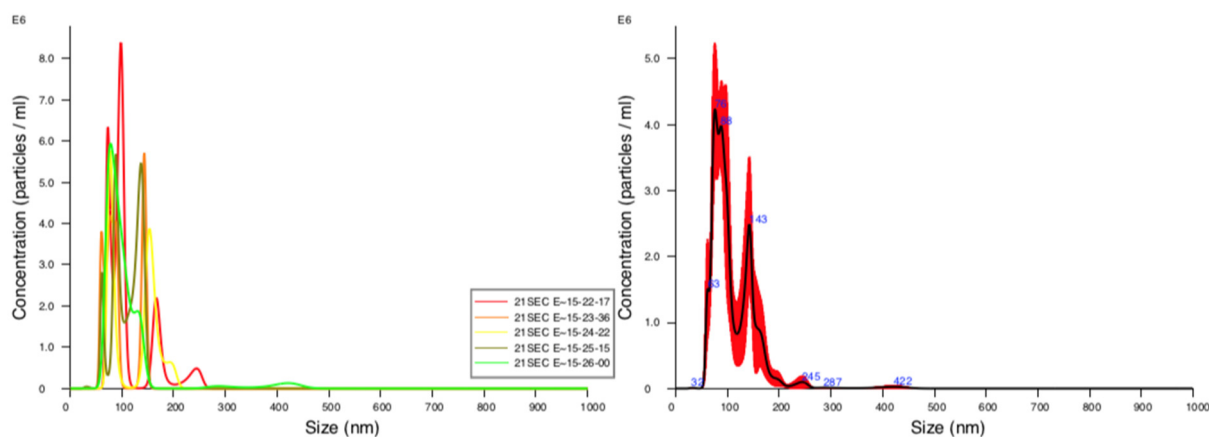

FTLA Concentration / Size graph for Experiment:  
21SEC EVs 40x 25.11.20 2020-11-25 15-21-18

Averaged FTLA Concentration / Size for Experiment:  
21SEC EVs 40x 25.11.20 2020-11-25 15-21-18  
Error bars indicate + / -1 standard error of the mean

|                                                                                                                                                                                                                                                                                                                                                                                                                                                                                                                                                                                                                                                                                                                                                                                                                                                                                                                                                                                                             |                                                                                                                                                                                                                                                                                                                                                                                                                                                                                                   |
|-------------------------------------------------------------------------------------------------------------------------------------------------------------------------------------------------------------------------------------------------------------------------------------------------------------------------------------------------------------------------------------------------------------------------------------------------------------------------------------------------------------------------------------------------------------------------------------------------------------------------------------------------------------------------------------------------------------------------------------------------------------------------------------------------------------------------------------------------------------------------------------------------------------------------------------------------------------------------------------------------------------|---------------------------------------------------------------------------------------------------------------------------------------------------------------------------------------------------------------------------------------------------------------------------------------------------------------------------------------------------------------------------------------------------------------------------------------------------------------------------------------------------|
| <p><b>Included Files</b></p> <p>21SEC EVs 40x 25.11.20 2020-11-25 15-22-17<br/>21SEC EVs 40x 25.11.20 2020-11-25 15-23-36<br/>21SEC EVs 40x 25.11.20 2020-11-25 15-24-22<br/>21SEC EVs 40x 25.11.20 2020-11-25 15-25-15<br/>21SEC EVs 40x 25.11.20 2020-11-25 15-26-00</p> <p><b>Details</b></p> <p>NTA Version: NTA 3.4 Build 3.4.003<br/>Script Used: SOP Standard Measurement 03-21-18PM 25~<br/>Time Captured: 15:21:18 25/11/2020<br/>Operator: Nadya24.11.20<br/>Pre-treatment:<br/>Sample Name: 21SEC EVs 40x 25.11.20<br/>Diluent: PBS<br/>Remarks:</p> <p><b>Capture Settings</b></p> <p>Camera Type: sCMOS<br/>Laser Type: Blue488<br/>Camera Level: 13<br/>Slider Shutter: 1232<br/>Slider Gain: 175<br/>FPS: 25.0<br/>Number of Frames: 749<br/>Temperature: 23.7 - 23.9 °C<br/>Viscosity: (Water) 0.911 - 0.916 cP<br/>Dilution factor: Dilution not recorded</p> <p><b>Analysis Settings</b></p> <p>Detect Threshold: 17<br/>Blur Size: Auto<br/>Max Jump Distance: Auto: 13.8 - 17.5 pix</p> | <p><b>Results</b></p> <p>Stats: Merged Data</p> <p>Mean: 110.1 nm<br/>Mode: 75.9 nm<br/>SD: 46.0 nm<br/>D10: 70.8 nm<br/>D50: 95.7 nm<br/>D90: 158.3 nm</p> <p>Stats: Mean +/- Standard Error</p> <p>Mean: 110.2 +/- 4.4 nm<br/>Mode: 97.0 +/- 12.2 nm<br/>SD: 42.1 +/- 6.5 nm<br/>D10: 70.4 +/- 2.2 nm<br/>D50: 106.0 +/- 10.5 nm<br/>D90: 154.3 +/- 8.4 nm</p> <p>Concentration (Upgrade): 2.42e+08 +/- 1.77e+07 particles/ml<br/>8.3 +/- 0.4 particles/frame<br/>8.8 +/- 0.4 centres/frame</p> |
|-------------------------------------------------------------------------------------------------------------------------------------------------------------------------------------------------------------------------------------------------------------------------------------------------------------------------------------------------------------------------------------------------------------------------------------------------------------------------------------------------------------------------------------------------------------------------------------------------------------------------------------------------------------------------------------------------------------------------------------------------------------------------------------------------------------------------------------------------------------------------------------------------------------------------------------------------------------------------------------------------------------|---------------------------------------------------------------------------------------------------------------------------------------------------------------------------------------------------------------------------------------------------------------------------------------------------------------------------------------------------------------------------------------------------------------------------------------------------------------------------------------------------|

Figure S17: PL-Dil, SEC fraction: 5-6

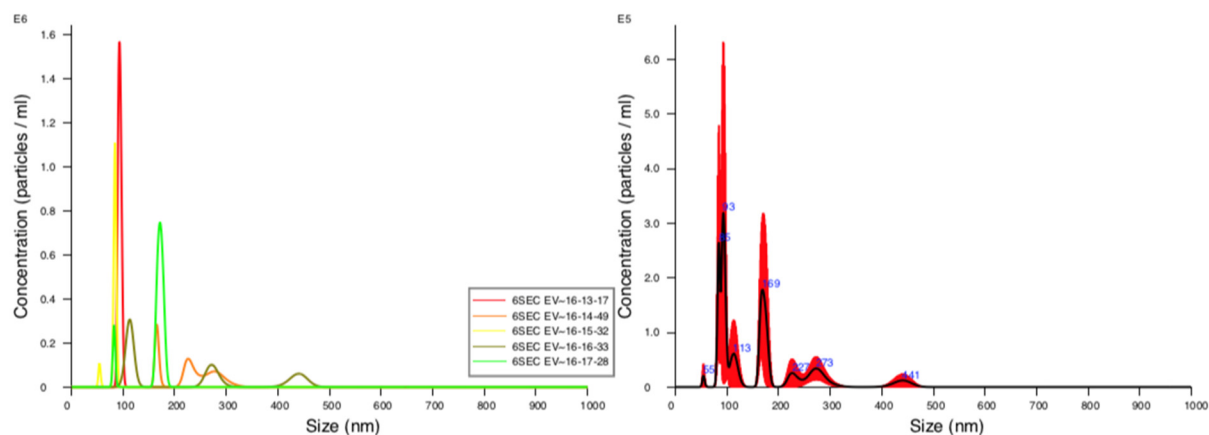

FTLA Concentration / Size graph for Experiment:  
6SEC EVs 20x CM-DIL 50pM 25.11.20 2020-11-25 16-12-06

Averaged FTLA Concentration / Size for Experiment:  
6SEC EVs 20x CM-DIL 50pM 25.11.20 2020-11-25 16-12-06  
Error bars indicate + / - 1 standard error of the mean

|                                                                                                                                                                                                                                                                                                                                                                                                                                                                                                                                                                                                                                                                                                                                                                                                                                                                                                                                                                                                                                                                       |                                                                                                                                                                                                                                                                                                                                                                                                                                                                                                                                                                                                 |
|-----------------------------------------------------------------------------------------------------------------------------------------------------------------------------------------------------------------------------------------------------------------------------------------------------------------------------------------------------------------------------------------------------------------------------------------------------------------------------------------------------------------------------------------------------------------------------------------------------------------------------------------------------------------------------------------------------------------------------------------------------------------------------------------------------------------------------------------------------------------------------------------------------------------------------------------------------------------------------------------------------------------------------------------------------------------------|-------------------------------------------------------------------------------------------------------------------------------------------------------------------------------------------------------------------------------------------------------------------------------------------------------------------------------------------------------------------------------------------------------------------------------------------------------------------------------------------------------------------------------------------------------------------------------------------------|
| <p><b>Included Files</b></p> <p>6SEC EVs 20x CM-DIL 50pM 25.11.20 2020-11-25 16-13-17<br/>6SEC EVs 20x CM-DIL 50pM 25.11.20 2020-11-25 16-14-49<br/>6SEC EVs 20x CM-DIL 50pM 25.11.20 2020-11-25 16-15-32<br/>6SEC EVs 20x CM-DIL 50pM 25.11.20 2020-11-25 16-16-33<br/>6SEC EVs 20x CM-DIL 50pM 25.11.20 2020-11-25 16-17-28</p> <p><b>Details</b></p> <p>NTA Version: NTA 3.4 Build 3.4.003<br/>Script Used: SOP Standard Measurement 04-12-06PM 25~<br/>Time Captured: 16:12:06 25/11/2020<br/>Operator: Nadya24.11.20<br/>Pre-treatment:<br/>Sample Name: 6SEC EVs 20x CM-DIL 50pM 25.11.20<br/>Diluent: PBS<br/>Remarks:</p> <p><b>Capture Settings</b></p> <p>Camera Type: sCMOS<br/>Laser Type: Blue488<br/>Camera Level: 15<br/>Slider Shutter: 1206<br/>Slider Gain: 245<br/>FPS: 25.0<br/>Number of Frames: 749<br/>Temperature: 25.1 °C<br/>Viscosity: (Water) 0.885 - 0.886 cP<br/>Dilution factor: Dilution not recorded</p> <p><b>Analysis Settings</b></p> <p>Detect Threshold: 17<br/>Blur Size: Auto<br/>Max Jump Distance: Auto: 9.2 - 21.2 pix</p> | <p><b>Results</b></p> <p>Stats: Merged Data</p> <p>Mean: 160.1 nm<br/>Mode: 92.9 nm<br/>SD: 88.9 nm<br/>D10: 84.7 nm<br/>D50: 123.4 nm<br/>D90: 277.0 nm</p> <p>Stats: Mean +/- Standard Error</p> <p>Mean: 158.8 +/- 31.5 nm<br/>Mode: 125.4 +/- 18.2 nm<br/>SD: 44.1 +/- 23.1 nm<br/>D10: 104.7 +/- 15.5 nm<br/>D50: 142.2 +/- 27.0 nm<br/>D90: 219.4 +/- 66.3 nm</p> <p>Concentration (Upgrade): 1.15e+07 +/- 1.23e+06 particles/ml<br/>0.7 +/- 0.1 particles/frame<br/>0.8 +/- 0.2 centres/frame</p> <p>Concentration measurements may be unreliable<br/>See summary file for more info</p> |
|-----------------------------------------------------------------------------------------------------------------------------------------------------------------------------------------------------------------------------------------------------------------------------------------------------------------------------------------------------------------------------------------------------------------------------------------------------------------------------------------------------------------------------------------------------------------------------------------------------------------------------------------------------------------------------------------------------------------------------------------------------------------------------------------------------------------------------------------------------------------------------------------------------------------------------------------------------------------------------------------------------------------------------------------------------------------------|-------------------------------------------------------------------------------------------------------------------------------------------------------------------------------------------------------------------------------------------------------------------------------------------------------------------------------------------------------------------------------------------------------------------------------------------------------------------------------------------------------------------------------------------------------------------------------------------------|

Figure S18: PL-Dil, SEC fraction: 7

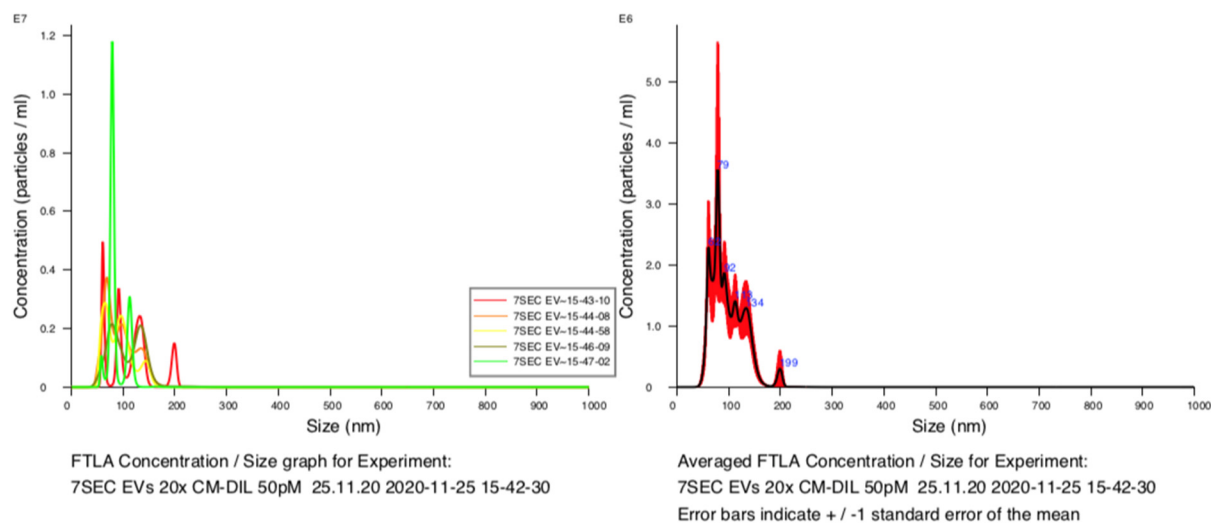

|                                                                                                                                                                                                                                                                                                                                                                                                                                                                                                                                                                                                                                                                                                                                                                                                                                                                                                                                                                                                                                                                               |                                                                                                                                                                                                                                                                                                                                                                                                                                                                                            |
|-------------------------------------------------------------------------------------------------------------------------------------------------------------------------------------------------------------------------------------------------------------------------------------------------------------------------------------------------------------------------------------------------------------------------------------------------------------------------------------------------------------------------------------------------------------------------------------------------------------------------------------------------------------------------------------------------------------------------------------------------------------------------------------------------------------------------------------------------------------------------------------------------------------------------------------------------------------------------------------------------------------------------------------------------------------------------------|--------------------------------------------------------------------------------------------------------------------------------------------------------------------------------------------------------------------------------------------------------------------------------------------------------------------------------------------------------------------------------------------------------------------------------------------------------------------------------------------|
| <p><b>Included Files</b></p> <p>7SEC EVs 20x CM-DIL 50pM 25.11.20 2020-11-25 15-43-10<br/>7SEC EVs 20x CM-DIL 50pM 25.11.20 2020-11-25 15-44-08<br/>7SEC EVs 20x CM-DIL 50pM 25.11.20 2020-11-25 15-44-58<br/>7SEC EVs 20x CM-DIL 50pM 25.11.20 2020-11-25 15-46-09<br/>7SEC EVs 20x CM-DIL 50pM 25.11.20 2020-11-25 15-47-02</p> <p><b>Details</b></p> <p>NTA Version: NTA 3.4 Build 3.4.003<br/>Script Used: SOP Standard Measurement 03-42-30PM 25~<br/>Time Captured: 15:42:30 25/11/2020<br/>Operator: Nadya24.11.20<br/>Pre-treatment:<br/>Sample Name: 7SEC EVs 20x CM-DIL 50pM 25.11.20<br/>Diluent: PBS<br/>Remarks:</p> <p><b>Capture Settings</b></p> <p>Camera Type: sCMOS<br/>Laser Type: Blue488<br/>Camera Level: 15<br/>Slider Shutter: 1206<br/>Slider Gain: 245<br/>FPS: 25.0<br/>Number of Frames: 749<br/>Temperature: 24.4 - 24.6 °C<br/>Viscosity: (Water) 0.897 - 0.900 cP<br/>Dilution factor: Dilution not recorded</p> <p><b>Analysis Settings</b></p> <p>Detect Threshold: 17<br/>Blur Size: Auto<br/>Max Jump Distance: Auto: 14.9 - 19.7 pix</p> | <p><b>Results</b></p> <p>Stats: Merged Data</p> <p>Mean: 98.2 nm<br/>Mode: 78.8 nm<br/>SD: 31.9 nm<br/>D10: 62.1 nm<br/>D50: 90.8 nm<br/>D90: 139.9 nm</p> <p>Stats: Mean +/- Standard Error</p> <p>Mean: 98.6 +/- 4.9 nm<br/>Mode: 70.3 +/- 3.6 nm<br/>SD: 29.5 +/- 4.1 nm<br/>D10: 64.6 +/- 2.6 nm<br/>D50: 95.6 +/- 6.1 nm<br/>D90: 145.6 +/- 13.2 nm<br/>Concentration (Upgrade): 1.59e+08 +/- 7.71e+06 particles/ml<br/>8.2 +/- 0.5 particles/frame<br/>8.5 +/- 0.5 centres/frame</p> |
|-------------------------------------------------------------------------------------------------------------------------------------------------------------------------------------------------------------------------------------------------------------------------------------------------------------------------------------------------------------------------------------------------------------------------------------------------------------------------------------------------------------------------------------------------------------------------------------------------------------------------------------------------------------------------------------------------------------------------------------------------------------------------------------------------------------------------------------------------------------------------------------------------------------------------------------------------------------------------------------------------------------------------------------------------------------------------------|--------------------------------------------------------------------------------------------------------------------------------------------------------------------------------------------------------------------------------------------------------------------------------------------------------------------------------------------------------------------------------------------------------------------------------------------------------------------------------------------|



Figure S19: PL-Dil, SEC fraction: 8

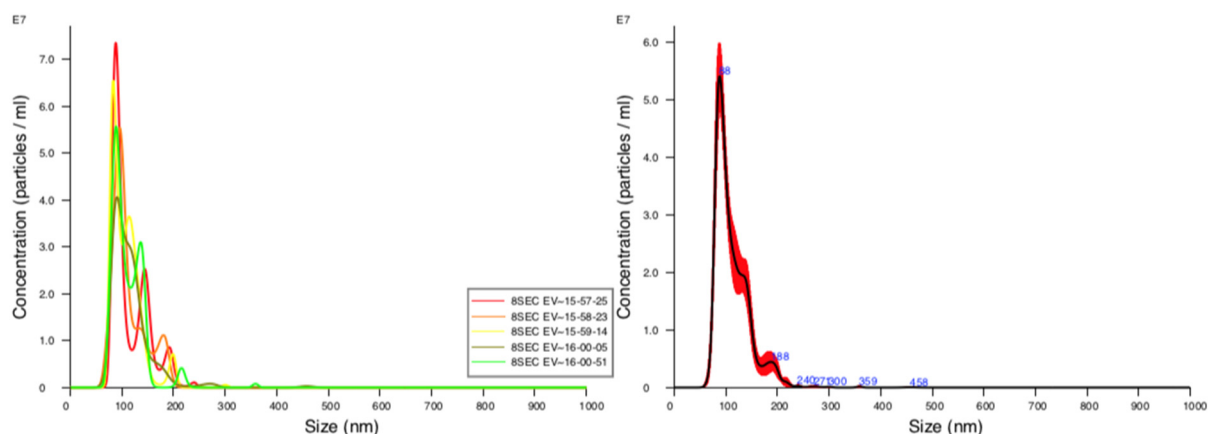

FTLA Concentration / Size graph for Experiment:  
8SEC EVs 20x CM-DIL 50pM 25.11.20 2020-11-25 15-57-04

Averaged FTLA Concentration / Size for Experiment:  
8SEC EVs 20x CM-DIL 50pM 25.11.20 2020-11-25 15-57-04  
Error bars indicate + / - 1 standard error of the mean

|                                                                                                                                                                                                                                                                                                                                                                                                                                                                                                                                                                                                                                                                                                                                                                                                                                                                                                                                                                                                                                                                                                                                                                                                                                                                                                                                                                      |                                                                                                                                                                                                                                                                                                                                                                                                                                                                                                                                                                                                                                                                  |
|----------------------------------------------------------------------------------------------------------------------------------------------------------------------------------------------------------------------------------------------------------------------------------------------------------------------------------------------------------------------------------------------------------------------------------------------------------------------------------------------------------------------------------------------------------------------------------------------------------------------------------------------------------------------------------------------------------------------------------------------------------------------------------------------------------------------------------------------------------------------------------------------------------------------------------------------------------------------------------------------------------------------------------------------------------------------------------------------------------------------------------------------------------------------------------------------------------------------------------------------------------------------------------------------------------------------------------------------------------------------|------------------------------------------------------------------------------------------------------------------------------------------------------------------------------------------------------------------------------------------------------------------------------------------------------------------------------------------------------------------------------------------------------------------------------------------------------------------------------------------------------------------------------------------------------------------------------------------------------------------------------------------------------------------|
| <p><b>Included Files</b></p> <p>8SEC EVs 20x CM-DIL 50pM 25.11.20 2020-11-25 15-57-25<br/>             8SEC EVs 20x CM-DIL 50pM 25.11.20 2020-11-25 15-58-23<br/>             8SEC EVs 20x CM-DIL 50pM 25.11.20 2020-11-25 15-59-14<br/>             8SEC EVs 20x CM-DIL 50pM 25.11.20 2020-11-25 16-00-05<br/>             8SEC EVs 20x CM-DIL 50pM 25.11.20 2020-11-25 16-00-51</p> <p><b>Details</b></p> <p>NTA Version: NTA 3.4 Build 3.4.003<br/>             Script Used: SOP Standard Measurement 03-57-04PM 25~<br/>             Time Captured: 15:57:04 25/11/2020<br/>             Operator: Nadya24.11.20<br/>             Pre-treatment:<br/>             Sample Name: 8SEC EVs 20x CM-DIL 50pM 25.11.20<br/>             Diluent: PBS<br/>             Remarks:</p> <p><b>Capture Settings</b></p> <p>Camera Type: sCMOS<br/>             Laser Type: Blue488<br/>             Camera Level: 13<br/>             Slider Shutter: 1232<br/>             Slider Gain: 175<br/>             FPS: 25.0<br/>             Number of Frames: 749<br/>             Temperature: 25.1 °C<br/>             Viscosity: (Water) 0.885 - 0.886 cP<br/>             Dilution factor: Dilution not recorded</p> <p><b>Analysis Settings</b></p> <p>Detect Threshold: 17<br/>             Blur Size: Auto<br/>             Max Jump Distance: Auto: 14.6 - 14.9 pix</p> | <p><b>Results</b></p> <p>Stats: Merged Data</p> <p>Mean: 112.4 nm<br/>             Mode: 87.9 nm<br/>             SD: 34.6 nm<br/>             D10: 80.6 nm<br/>             D50: 102.5 nm<br/>             D90: 153.3 nm</p> <p>Stats: Mean +/- Standard Error</p> <p>Mean: 112.5 +/- 1.3 nm<br/>             Mode: 89.1 +/- 2.0 nm<br/>             SD: 34.5 +/- 1.6 nm<br/>             D10: 80.6 +/- 0.6 nm<br/>             D50: 102.5 +/- 1.3 nm<br/>             D90: 154.7 +/- 5.8 nm</p> <p>Concentration (Upgrade): 2.56e+09 +/- 5.73e+07 particles/ml<br/>             119.5 +/- 2.7 particles/frame<br/>             112.6 +/- 2.1 centres/frame</p> |
|----------------------------------------------------------------------------------------------------------------------------------------------------------------------------------------------------------------------------------------------------------------------------------------------------------------------------------------------------------------------------------------------------------------------------------------------------------------------------------------------------------------------------------------------------------------------------------------------------------------------------------------------------------------------------------------------------------------------------------------------------------------------------------------------------------------------------------------------------------------------------------------------------------------------------------------------------------------------------------------------------------------------------------------------------------------------------------------------------------------------------------------------------------------------------------------------------------------------------------------------------------------------------------------------------------------------------------------------------------------------|------------------------------------------------------------------------------------------------------------------------------------------------------------------------------------------------------------------------------------------------------------------------------------------------------------------------------------------------------------------------------------------------------------------------------------------------------------------------------------------------------------------------------------------------------------------------------------------------------------------------------------------------------------------|



Figure S20: PL-Dil, SEC fraction: 9

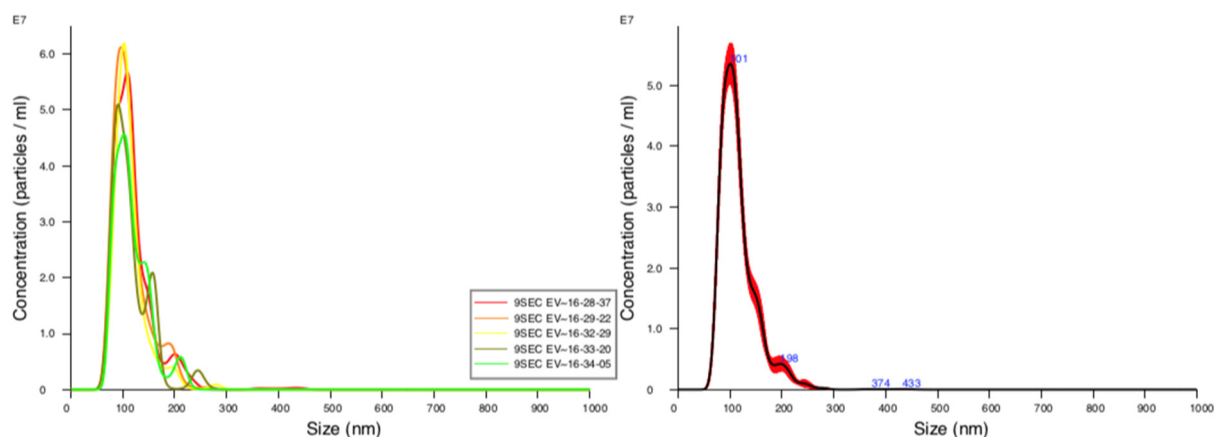

FTLA Concentration / Size graph for Experiment:  
9SEC EVs 20x CM-DIL 50pM 25.11.20 2020-11-25 16-28-06

Averaged FTLA Concentration / Size for Experiment:  
9SEC EVs 20x CM-DIL 50pM 25.11.20 2020-11-25 16-28-06  
Error bars indicate + / -1 standard error of the mean

|                                                                                                                                                                                                                                                                                                                                                                                                                                                                                                                                                                                                                                                                                                                                                                                                                                                                                                                                                                                                                                                                        |                                                                                                                                                                                                                                                                                                                                                                                                                                                                                                         |
|------------------------------------------------------------------------------------------------------------------------------------------------------------------------------------------------------------------------------------------------------------------------------------------------------------------------------------------------------------------------------------------------------------------------------------------------------------------------------------------------------------------------------------------------------------------------------------------------------------------------------------------------------------------------------------------------------------------------------------------------------------------------------------------------------------------------------------------------------------------------------------------------------------------------------------------------------------------------------------------------------------------------------------------------------------------------|---------------------------------------------------------------------------------------------------------------------------------------------------------------------------------------------------------------------------------------------------------------------------------------------------------------------------------------------------------------------------------------------------------------------------------------------------------------------------------------------------------|
| <p><b>Included Files</b></p> <p>9SEC EVs 20x CM-DIL 50pM 25.11.20 2020-11-25 16-28-37<br/>9SEC EVs 20x CM-DIL 50pM 25.11.20 2020-11-25 16-29-22<br/>9SEC EVs 20x CM-DIL 50pM 25.11.20 2020-11-25 16-32-29<br/>9SEC EVs 20x CM-DIL 50pM 25.11.20 2020-11-25 16-33-20<br/>9SEC EVs 20x CM-DIL 50pM 25.11.20 2020-11-25 16-34-05</p> <p><b>Details</b></p> <p>NTA Version: NTA 3.4 Build 3.4.003<br/>Script Used: SOP Standard Measurement 04-28-06PM 25~<br/>Time Captured: 16:28:06 25/11/2020<br/>Operator: Nadya24.11.20<br/>Pre-treatment:<br/>Sample Name: 9SEC EVs 20x CM-DIL 50pM 25.11.20<br/>Diluent: PBS<br/>Remarks:</p> <p><b>Capture Settings</b></p> <p>Camera Type: sCMOS<br/>Laser Type: Blue488<br/>Camera Level: 13<br/>Slider Shutter: 1232<br/>Slider Gain: 175<br/>FPS: 25.0<br/>Number of Frames: 749<br/>Temperature: 25.4 °C<br/>Viscosity: (Water) 0.879 - 0.880 cP<br/>Dilution factor: Dilution not recorded</p> <p><b>Analysis Settings</b></p> <p>Detect Threshold: 17<br/>Blur Size: Auto<br/>Max Jump Distance: Auto: 14.1 - 15.0 pix</p> | <p><b>Results</b></p> <p>Stats: Merged Data</p> <p>Mean: 116.2 nm<br/>Mode: 100.7 nm<br/>SD: 37.5 nm<br/>D10: 80.5 nm<br/>D50: 107.6 nm<br/>D90: 161.5 nm</p> <p>Stats: Mean +/- Standard Error</p> <p>Mean: 116.1 +/- 1.1 nm<br/>Mode: 100.1 +/- 3.1 nm<br/>SD: 37.0 +/- 1.8 nm<br/>D10: 80.6 +/- 0.8 nm<br/>D50: 107.6 +/- 1.0 nm<br/>D90: 161.4 +/- 2.8 nm</p> <p>Concentration (Upgrade): 3.38e+09 +/- 1.54e+08 particles/ml<br/>175.5 +/- 10.7 particles/frame<br/>151.2 +/- 6.9 centres/frame</p> |
|------------------------------------------------------------------------------------------------------------------------------------------------------------------------------------------------------------------------------------------------------------------------------------------------------------------------------------------------------------------------------------------------------------------------------------------------------------------------------------------------------------------------------------------------------------------------------------------------------------------------------------------------------------------------------------------------------------------------------------------------------------------------------------------------------------------------------------------------------------------------------------------------------------------------------------------------------------------------------------------------------------------------------------------------------------------------|---------------------------------------------------------------------------------------------------------------------------------------------------------------------------------------------------------------------------------------------------------------------------------------------------------------------------------------------------------------------------------------------------------------------------------------------------------------------------------------------------------|

Figure S21: PL-Dil, SEC fraction: 10

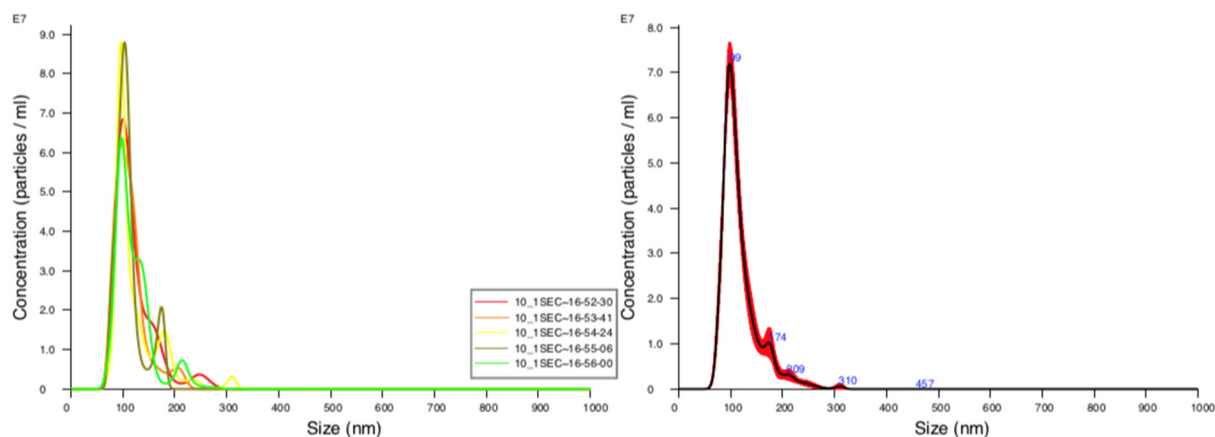

FTLA Concentration / Size graph for Experiment:  
10\_1SEC EVs 20x CM-DIL 50pM 25.11.20 2020-11-25 16-51-43

Averaged FTLA Concentration / Size for Experiment:  
10\_1SEC EVs 20x CM-DIL 50pM 25.11.20 2020-11-25 16-51-43  
Error bars indicate + / - 1 standard error of the mean

|                                                                                                                                                                                                                                                                                                                                                                                                                                                                                                                                                                                                                                                                                                                                                                                                                                                                                                                                                                                                                                                                                                                       |                                                                                                                                                                                                                                                                                                                                                                                                                                                                                                                  |
|-----------------------------------------------------------------------------------------------------------------------------------------------------------------------------------------------------------------------------------------------------------------------------------------------------------------------------------------------------------------------------------------------------------------------------------------------------------------------------------------------------------------------------------------------------------------------------------------------------------------------------------------------------------------------------------------------------------------------------------------------------------------------------------------------------------------------------------------------------------------------------------------------------------------------------------------------------------------------------------------------------------------------------------------------------------------------------------------------------------------------|------------------------------------------------------------------------------------------------------------------------------------------------------------------------------------------------------------------------------------------------------------------------------------------------------------------------------------------------------------------------------------------------------------------------------------------------------------------------------------------------------------------|
| <p><b>Included Files</b></p> <p>10_1SEC EVs 20x CM-DIL 50pM 25.11.20 2020-11-25 16-52-30<br/> 10_1SEC EVs 20x CM-DIL 50pM 25.11.20 2020-11-25 16-53-41<br/> 10_1SEC EVs 20x CM-DIL 50pM 25.11.20 2020-11-25 16-54-24<br/> 10_1SEC EVs 20x CM-DIL 50pM 25.11.20 2020-11-25 16-55-06<br/> 10_1SEC EVs 20x CM-DIL 50pM 25.11.20 2020-11-25 16-56-00</p> <p><b>Details</b></p> <p>NTA Version: NTA 3.4 Build 3.4.003<br/> Script Used: SOP Standard Measurement 04-51-43PM 25~<br/> Time Captured: 16:51:43 25/11/2020<br/> Operator: Nadya24.11.20<br/> Pre-treatment:<br/> Sample Name: 10_1SEC EVs 20x CM-DIL 50pM 25.11.20<br/> Diluent: PBS<br/> Remarks:</p> <p><b>Capture Settings</b></p> <p>Camera Type: sCMOS<br/> Laser Type: Blue488<br/> Camera Level: 12<br/> Slider Shutter: 1200<br/> Slider Gain: 125<br/> FPS: 25.0<br/> Number of Frames: 749<br/> Temperature: 25.6 - 25.7 °C<br/> Viscosity: (Water) 0.876 - 0.877 cP<br/> Dilution factor: Dilution not recorded</p> <p><b>Analysis Settings</b></p> <p>Detect Threshold: 17<br/> Blur Size: Auto<br/> Max Jump Distance: Auto: 14.2 - 14.7 pix</p> | <p><b>Results</b></p> <p>Stats: Merged Data</p> <p>Mean: 117.8 nm<br/> Mode: 98.3 nm<br/> SD: 36.9 nm<br/> D10: 84.5 nm<br/> D50: 107.2 nm<br/> D90: 168.9 nm</p> <p>Stats: Mean +/- Standard Error</p> <p>Mean: 117.8 +/- 2.4 nm<br/> Mode: 99.0 +/- 1.3 nm<br/> SD: 36.1 +/- 3.2 nm<br/> D10: 84.5 +/- 0.9 nm<br/> D50: 107.5 +/- 1.2 nm<br/> D90: 165.9 +/- 5.5 nm</p> <p>Concentration (Upgrade): 3.58e+09 +/- 1.00e+08 particles/ml<br/> 140.6 +/- 6.5 particles/frame<br/> 134.0 +/- 4.8 centres/frame</p> |
|-----------------------------------------------------------------------------------------------------------------------------------------------------------------------------------------------------------------------------------------------------------------------------------------------------------------------------------------------------------------------------------------------------------------------------------------------------------------------------------------------------------------------------------------------------------------------------------------------------------------------------------------------------------------------------------------------------------------------------------------------------------------------------------------------------------------------------------------------------------------------------------------------------------------------------------------------------------------------------------------------------------------------------------------------------------------------------------------------------------------------|------------------------------------------------------------------------------------------------------------------------------------------------------------------------------------------------------------------------------------------------------------------------------------------------------------------------------------------------------------------------------------------------------------------------------------------------------------------------------------------------------------------|

Figure S22: PL-Dil, SEC fraction: 11

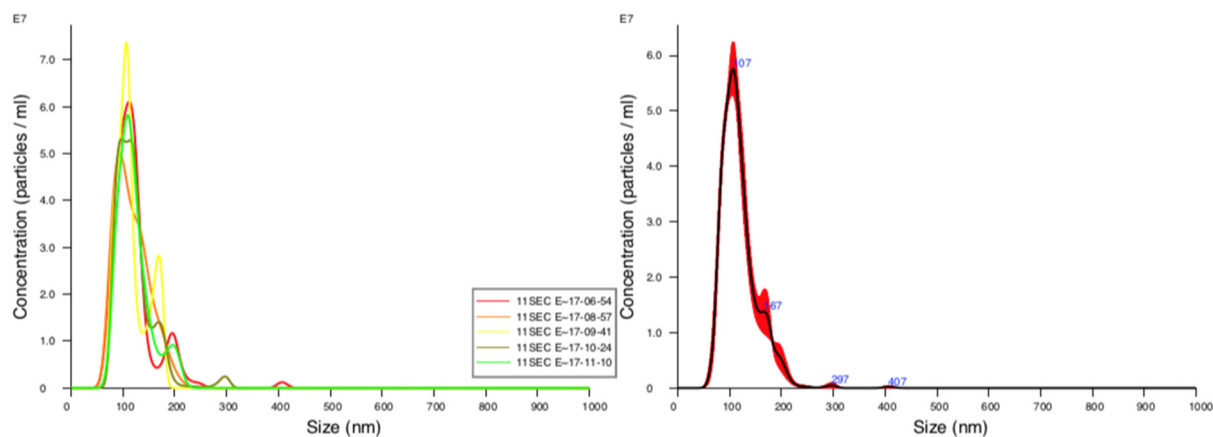

FTLA Concentration / Size graph for Experiment:  
11SEC EVs 20x CM-DIL 50pM 25.11.20 2020-11-25 17-06-39

Averaged FTLA Concentration / Size for Experiment:  
11SEC EVs 20x CM-DIL 50pM 25.11.20 2020-11-25 17-06-39  
Error bars indicate + / -1 standard error of the mean

|                                                                                                                                                                                                                                                                                                                                                                                                                                                                                                                                                                                                                                                                                                                                                                                                                                                                                                                                                                                                                                                                                     |                                                                                                                                                                                                                                                                                                                                                                                                                                                                                                        |
|-------------------------------------------------------------------------------------------------------------------------------------------------------------------------------------------------------------------------------------------------------------------------------------------------------------------------------------------------------------------------------------------------------------------------------------------------------------------------------------------------------------------------------------------------------------------------------------------------------------------------------------------------------------------------------------------------------------------------------------------------------------------------------------------------------------------------------------------------------------------------------------------------------------------------------------------------------------------------------------------------------------------------------------------------------------------------------------|--------------------------------------------------------------------------------------------------------------------------------------------------------------------------------------------------------------------------------------------------------------------------------------------------------------------------------------------------------------------------------------------------------------------------------------------------------------------------------------------------------|
| <p><b>Included Files</b></p> <p>11SEC EVs 20x CM-DIL 50pM 25.11.20 2020-11-25 17-06-54<br/>11SEC EVs 20x CM-DIL 50pM 25.11.20 2020-11-25 17-08-57<br/>11SEC EVs 20x CM-DIL 50pM 25.11.20 2020-11-25 17-09-41<br/>11SEC EVs 20x CM-DIL 50pM 25.11.20 2020-11-25 17-10-24<br/>11SEC EVs 20x CM-DIL 50pM 25.11.20 2020-11-25 17-11-10</p> <p><b>Details</b></p> <p>NTA Version: NTA 3.4 Build 3.4.003<br/>Script Used: SOP Standard Measurement 05-06-39PM 25~<br/>Time Captured: 17:06:39 25/11/2020<br/>Operator: Nadya24.11.20<br/>Pre-treatment:<br/>Sample Name: 11SEC EVs 20x CM-DIL 50pM 25.11.20<br/>Diluent: PBS<br/>Remarks:</p> <p><b>Capture Settings</b></p> <p>Camera Type: sCMOS<br/>Laser Type: Blue488<br/>Camera Level: 12<br/>Slider Shutter: 1200<br/>Slider Gain: 125<br/>FPS: 25.0<br/>Number of Frames: 749<br/>Temperature: 25.1 - 25.2 °C<br/>Viscosity: (Water) 0.884 - 0.887 cP<br/>Dilution factor: Dilution not recorded</p> <p><b>Analysis Settings</b></p> <p>Detect Threshold: 17<br/>Blur Size: Auto<br/>Max Jump Distance: Auto: 14.3 - 14.7 pix</p> | <p><b>Results</b></p> <p>Stats: Merged Data</p> <p>Mean: 119.2 nm<br/>Mode: 106.5 nm<br/>SD: 36.1 nm<br/>D10: 82.5 nm<br/>D50: 111.8 nm<br/>D90: 168.4 nm</p> <p>Stats: Mean +/- Standard Error</p> <p>Mean: 119.2 +/- 0.9 nm<br/>Mode: 103.7 +/- 3.5 nm<br/>SD: 35.5 +/- 2.5 nm<br/>D10: 82.7 +/- 1.5 nm<br/>D50: 112.0 +/- 1.0 nm<br/>D90: 170.7 +/- 3.1 nm</p> <p>Concentration (Upgrade): 3.76e+09 +/- 8.95e+07 particles/ml<br/>148.3 +/- 4.6 particles/frame<br/>147.7 +/- 4.8 centres/frame</p> |
|-------------------------------------------------------------------------------------------------------------------------------------------------------------------------------------------------------------------------------------------------------------------------------------------------------------------------------------------------------------------------------------------------------------------------------------------------------------------------------------------------------------------------------------------------------------------------------------------------------------------------------------------------------------------------------------------------------------------------------------------------------------------------------------------------------------------------------------------------------------------------------------------------------------------------------------------------------------------------------------------------------------------------------------------------------------------------------------|--------------------------------------------------------------------------------------------------------------------------------------------------------------------------------------------------------------------------------------------------------------------------------------------------------------------------------------------------------------------------------------------------------------------------------------------------------------------------------------------------------|

Figure S23: PL-Dil, SEC fraction: 12

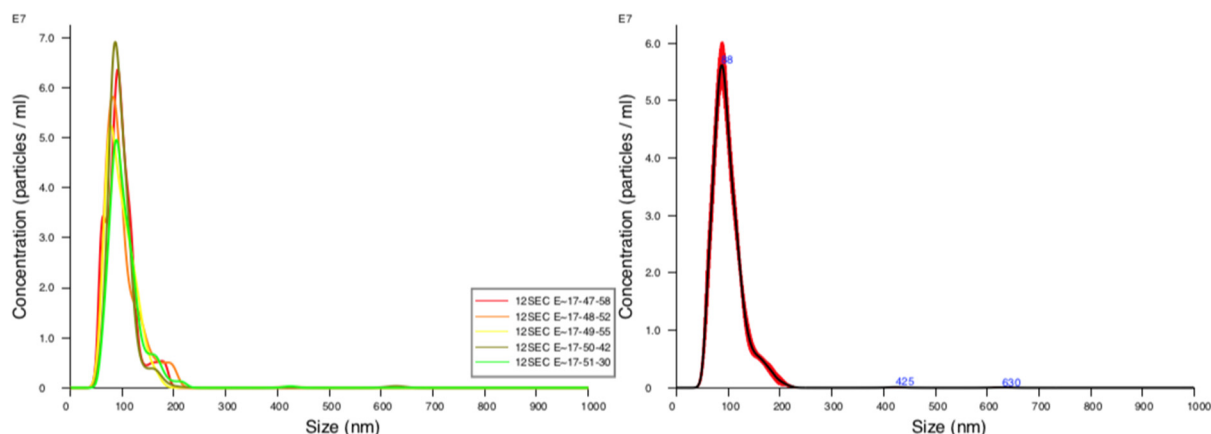

FTLA Concentration / Size graph for Experiment:  
 12SEC EVs 20x CM-DIL 50pM 25.11.20 2020-11-25 17-47-36

Averaged FTLA Concentration / Size for Experiment:  
 12SEC EVs 20x CM-DIL 50pM 25.11.20 2020-11-25 17-47-36  
 Error bars indicate + / - 1 standard error of the mean

|                                                                                                                                                                                                                                                                                                                                                                                                                                                                                                                                                                                                                                                                                                                                                                                                                                                                                                                                                                                                                                                                                                                                                                                                                                                                                                                                       |                                                                                                                                                                                                                                                                                                                                                                                                                                                                                                                                                                                                                                       |
|---------------------------------------------------------------------------------------------------------------------------------------------------------------------------------------------------------------------------------------------------------------------------------------------------------------------------------------------------------------------------------------------------------------------------------------------------------------------------------------------------------------------------------------------------------------------------------------------------------------------------------------------------------------------------------------------------------------------------------------------------------------------------------------------------------------------------------------------------------------------------------------------------------------------------------------------------------------------------------------------------------------------------------------------------------------------------------------------------------------------------------------------------------------------------------------------------------------------------------------------------------------------------------------------------------------------------------------|---------------------------------------------------------------------------------------------------------------------------------------------------------------------------------------------------------------------------------------------------------------------------------------------------------------------------------------------------------------------------------------------------------------------------------------------------------------------------------------------------------------------------------------------------------------------------------------------------------------------------------------|
| <p><b>Included Files</b></p> <p>12SEC EVs 20x CM-DIL 50pM 25.11.20 2020-11-25 17-47-58<br/>           12SEC EVs 20x CM-DIL 50pM 25.11.20 2020-11-25 17-48-52<br/>           12SEC EVs 20x CM-DIL 50pM 25.11.20 2020-11-25 17-49-55<br/>           12SEC EVs 20x CM-DIL 50pM 25.11.20 2020-11-25 17-50-42<br/>           12SEC EVs 20x CM-DIL 50pM 25.11.20 2020-11-25 17-51-30</p> <p><b>Details</b></p> <p>NTA Version: NTA 3.4 Build 3.4.003<br/>           Script Used: SOP Standard Measurement 05-47-36PM 25~<br/>           Time Captured: 17:47:36 25/11/2020<br/>           Operator: Nadya24.11.20<br/>           Pre-treatment:<br/>           Sample Name: 12SEC EVs 20x CM-DIL 50pM 25.11.20<br/>           Diluent: PBS<br/>           Remarks:</p> <p><b>Capture Settings</b></p> <p>Camera Type: sCMOS<br/>           Laser Type: Blue488<br/>           Camera Level: 13<br/>           Slider Shutter: 1232<br/>           Slider Gain: 175<br/>           FPS: 25.0<br/>           Number of Frames: 749<br/>           Temperature: 25.2 - 25.3 °C<br/>           Viscosity: (Water) 0.882 - 0.884 cP<br/>           Dilution factor: Dilution not recorded</p> <p><b>Analysis Settings</b></p> <p>Detect Threshold: 17<br/>           Blur Size: Auto<br/>           Max Jump Distance: Auto: 15.3 - 16.1 pix</p> | <p><b>Results</b></p> <p>Stats: Merged Data</p> <p>Mean: 99.8 nm<br/>           Mode: 87.6 nm<br/>           SD: 35.7 nm<br/>           D10: 67.6 nm<br/>           D50: 93.5 nm<br/>           D90: 136.9 nm</p> <p>Stats: Mean +/- Standard Error</p> <p>Mean: 100.0 +/- 1.6 nm<br/>           Mode: 85.6 +/- 2.4 nm<br/>           SD: 35.0 +/- 3.4 nm<br/>           D10: 68.0 +/- 1.8 nm<br/>           D50: 93.6 +/- 1.2 nm<br/>           D90: 137.0 +/- 5.0 nm</p> <p>Concentration (Upgrade): 3.15e+09 +/- 1.08e+08 particles/ml<br/>           114.9 +/- 5.8 particles/frame<br/>           122.7 +/- 6.0 centres/frame</p> |
|---------------------------------------------------------------------------------------------------------------------------------------------------------------------------------------------------------------------------------------------------------------------------------------------------------------------------------------------------------------------------------------------------------------------------------------------------------------------------------------------------------------------------------------------------------------------------------------------------------------------------------------------------------------------------------------------------------------------------------------------------------------------------------------------------------------------------------------------------------------------------------------------------------------------------------------------------------------------------------------------------------------------------------------------------------------------------------------------------------------------------------------------------------------------------------------------------------------------------------------------------------------------------------------------------------------------------------------|---------------------------------------------------------------------------------------------------------------------------------------------------------------------------------------------------------------------------------------------------------------------------------------------------------------------------------------------------------------------------------------------------------------------------------------------------------------------------------------------------------------------------------------------------------------------------------------------------------------------------------------|

Figure S24: PL-Dil, SEC fraction: 13

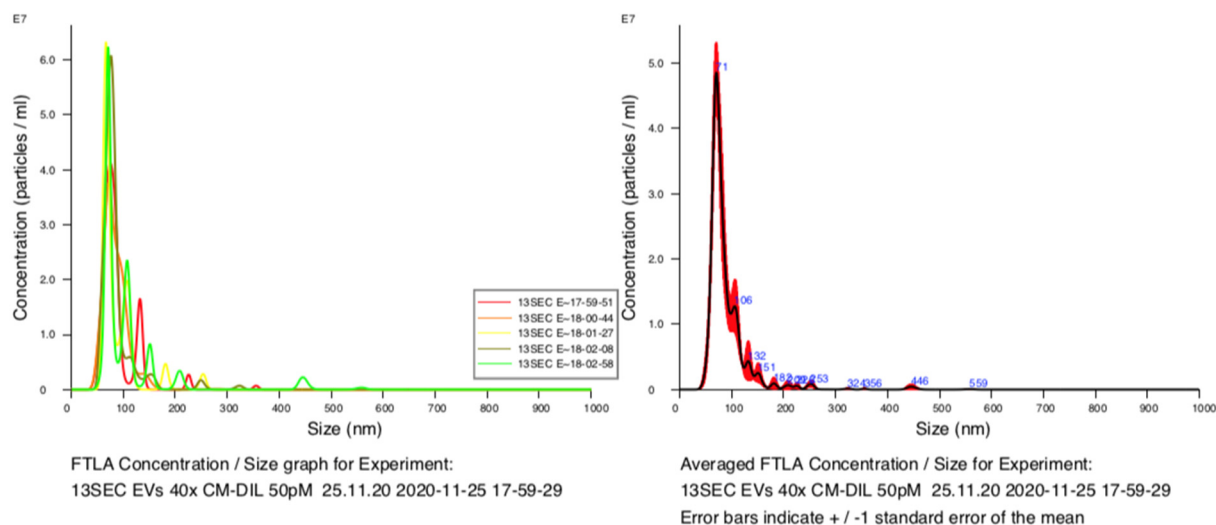

|                                                                                                                                                                                                                                                                                                                                                                                                                                                                                                                                                                                                                                                                                                                                                                                                                                                                                                                                                                                                                                                                                                           |                                                                                                                                                                                                                                                                                                                                                                                                                                                                                                        |
|-----------------------------------------------------------------------------------------------------------------------------------------------------------------------------------------------------------------------------------------------------------------------------------------------------------------------------------------------------------------------------------------------------------------------------------------------------------------------------------------------------------------------------------------------------------------------------------------------------------------------------------------------------------------------------------------------------------------------------------------------------------------------------------------------------------------------------------------------------------------------------------------------------------------------------------------------------------------------------------------------------------------------------------------------------------------------------------------------------------|--------------------------------------------------------------------------------------------------------------------------------------------------------------------------------------------------------------------------------------------------------------------------------------------------------------------------------------------------------------------------------------------------------------------------------------------------------------------------------------------------------|
| <p><b>Included Files</b></p> <p>13SEC EVs 40x CM-DIL 50pM 25.11.20 2020-11-25 17-59-51<br/> 13SEC EVs 40x CM-DIL 50pM 25.11.20 2020-11-25 18-00-44<br/> 13SEC EVs 40x CM-DIL 50pM 25.11.20 2020-11-25 18-01-27<br/> 13SEC EVs 40x CM-DIL 50pM 25.11.20 2020-11-25 18-02-08<br/> 13SEC EVs 40x CM-DIL 50pM 25.11.20 2020-11-25 18-02-58</p> <p><b>Details</b></p> <p>NTA Version: NTA 3.4 Build 3.4.003<br/> Script Used: SOP Standard Measurement 05-59-29PM 25~<br/> Time Captured: 17:59:29 25/11/2020<br/> Operator: Nadya24.11.20<br/> Pre-treatment:<br/> Sample Name: 13SEC EVs 40x CM-DIL 50pM 25.11.20<br/> Diluent: PBS<br/> Remarks:</p> <p><b>Capture Settings</b></p> <p>Camera Type: sCMOS<br/> Laser Type: Blue488<br/> Camera Level: 14<br/> Slider Shutter: 1259<br/> Slider Gain: 245<br/> FPS: 25.0<br/> Number of Frames: 749<br/> Temperature: 25.2 - 25.3 °C<br/> Viscosity: (Water) 0.883 - 0.885 cP<br/> Dilution factor: Dilution not recorded</p> <p><b>Analysis Settings</b></p> <p>Detect Threshold: 17<br/> Blur Size: Auto<br/> Max Jump Distance: Auto: 16.5 - 17.5 pix</p> | <p><b>Results</b></p> <p>Stats: Merged Data<br/> Mean: 90.5 nm<br/> Mode: 70.6 nm<br/> SD: 46.6 nm<br/> D10: 61.9 nm<br/> D50: 77.6 nm<br/> D90: 126.0 nm</p> <p>Stats: Mean +/- Standard Error<br/> Mean: 90.8 +/- 4.1 nm<br/> Mode: 72.2 +/- 1.6 nm<br/> SD: 42.7 +/- 9.1 nm<br/> D10: 61.7 +/- 1.1 nm<br/> D50: 77.5 +/- 1.1 nm<br/> D90: 125.7 +/- 7.9 nm</p> <p>Concentration (Upgrade): 1.65e+09 +/- 5.05e+07 particles/ml<br/> 51.7 +/- 0.7 particles/frame<br/> 60.3 +/- 1.0 centres/frame</p> |
|-----------------------------------------------------------------------------------------------------------------------------------------------------------------------------------------------------------------------------------------------------------------------------------------------------------------------------------------------------------------------------------------------------------------------------------------------------------------------------------------------------------------------------------------------------------------------------------------------------------------------------------------------------------------------------------------------------------------------------------------------------------------------------------------------------------------------------------------------------------------------------------------------------------------------------------------------------------------------------------------------------------------------------------------------------------------------------------------------------------|--------------------------------------------------------------------------------------------------------------------------------------------------------------------------------------------------------------------------------------------------------------------------------------------------------------------------------------------------------------------------------------------------------------------------------------------------------------------------------------------------------|

Figure S25: PL-Dil, SEC fraction: 14

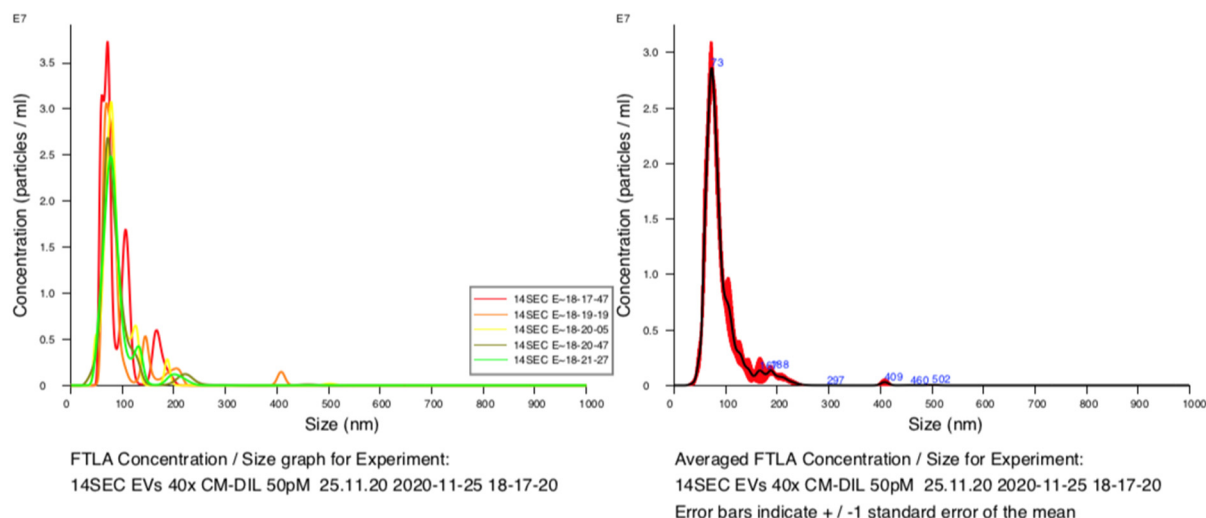

#### Included Files

14SEC EVs 40x CM-DIL 50pM 25.11.20 2020-11-25 18-17-47  
14SEC EVs 40x CM-DIL 50pM 25.11.20 2020-11-25 18-19-19  
14SEC EVs 40x CM-DIL 50pM 25.11.20 2020-11-25 18-20-05  
14SEC EVs 40x CM-DIL 50pM 25.11.20 2020-11-25 18-20-47  
14SEC EVs 40x CM-DIL 50pM 25.11.20 2020-11-25 18-21-27

#### Details

NTA Version: NTA 3.4 Build 3.4.003  
Script Used: SOP Standard Measurement 06-17-20PM 25~  
Time Captured: 18:17:20 25/11/2020  
Operator: Nadya24.11.20  
Pre-treatment:  
Sample Name: 14SEC EVs 40x CM-DIL 50pM 25.11.20  
Diluent: PBS  
Remarks:

#### Capture Settings

Camera Type: sCMOS  
Laser Type: Blue488  
Camera Level: 14  
Slider Shutter: 1259  
Slider Gain: 245  
FPS: 25.0  
Number of Frames: 749  
Temperature: 25.0 - 25.1 °C  
Viscosity: (Water) 0.887 - 0.889 cP  
Dilution factor: Dilution not recorded

#### Analysis Settings

Detect Threshold: 17  
Blur Size: Auto  
Max Jump Distance: Auto: 16.0 - 17.6 pix

#### Results

##### Stats: Merged Data

Mean: 91.0 nm  
Mode: 72.7 nm  
SD: 43.4 nm  
D10: 60.6 nm  
D50: 78.8 nm  
D90: 132.4 nm

##### Stats: Mean +/- Standard Error

Mean: 91.0 +/- 1.9 nm  
Mode: 73.8 +/- 1.8 nm  
SD: 42.4 +/- 4.9 nm  
D10: 60.7 +/- 0.8 nm  
D50: 78.7 +/- 1.0 nm  
D90: 137.6 +/- 8.2 nm

Concentration (Upgrade): 1.14e+09 +/- 4.77e+07 particles/ml  
37.8 +/- 2.4 particles/frame  
44.4 +/- 2.6 centres/frame

Concentration measurements may require some caution due to noise  
See summary file for more info

Figure S26: PL-Dil, SEC fraction: 15

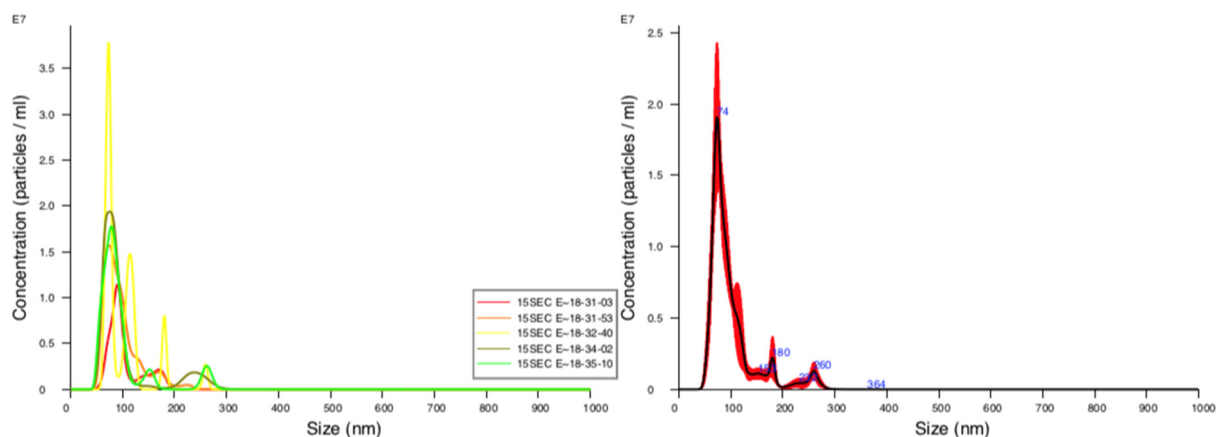

FTLA Concentration / Size graph for Experiment:  
 15SEC EVs 40x CM-DIL 50pM 25.11.20 2020-11-25 18-30-29

Averaged FTLA Concentration / Size for Experiment:  
 15SEC EVs 40x CM-DIL 50pM 25.11.20 2020-11-25 18-30-29  
 Error bars indicate + / - 1 standard error of the mean

|                                                                                                                                                                                                                                                                                                                                                                                                                                                                                                                                                                                                                                                                                                                                                                                                                                                                                                                                                                                                                                                                                                                                                                                                                                                                                                                                       |                                                                                                                                                                                                                                                                                                                                                                                                                                                                                                                                                                                                                                      |
|---------------------------------------------------------------------------------------------------------------------------------------------------------------------------------------------------------------------------------------------------------------------------------------------------------------------------------------------------------------------------------------------------------------------------------------------------------------------------------------------------------------------------------------------------------------------------------------------------------------------------------------------------------------------------------------------------------------------------------------------------------------------------------------------------------------------------------------------------------------------------------------------------------------------------------------------------------------------------------------------------------------------------------------------------------------------------------------------------------------------------------------------------------------------------------------------------------------------------------------------------------------------------------------------------------------------------------------|--------------------------------------------------------------------------------------------------------------------------------------------------------------------------------------------------------------------------------------------------------------------------------------------------------------------------------------------------------------------------------------------------------------------------------------------------------------------------------------------------------------------------------------------------------------------------------------------------------------------------------------|
| <p><b>Included Files</b></p> <p>15SEC EVs 40x CM-DIL 50pM 25.11.20 2020-11-25 18-31-03<br/>           15SEC EVs 40x CM-DIL 50pM 25.11.20 2020-11-25 18-31-53<br/>           15SEC EVs 40x CM-DIL 50pM 25.11.20 2020-11-25 18-32-40<br/>           15SEC EVs 40x CM-DIL 50pM 25.11.20 2020-11-25 18-34-02<br/>           15SEC EVs 40x CM-DIL 50pM 25.11.20 2020-11-25 18-35-10</p> <p><b>Details</b></p> <p>NTA Version: NTA 3.4 Build 3.4.003<br/>           Script Used: SOP Standard Measurement 06-30-29PM 25~<br/>           Time Captured: 18:30:29 25/11/2020<br/>           Operator: Nadya24.11.20<br/>           Pre-treatment:<br/>           Sample Name: 15SEC EVs 40x CM-DIL 50pM 25.11.20<br/>           Diluent: PBS<br/>           Remarks:</p> <p><b>Capture Settings</b></p> <p>Camera Type: sCMOS<br/>           Laser Type: Blue488<br/>           Camera Level: 14<br/>           Slider Shutter: 1259<br/>           Slider Gain: 245<br/>           FPS: 25.0<br/>           Number of Frames: 749<br/>           Temperature: 25.0 - 25.1 °C<br/>           Viscosity: (Water) 0.886 - 0.889 cP<br/>           Dilution factor: Dilution not recorded</p> <p><b>Analysis Settings</b></p> <p>Detect Threshold: 17<br/>           Blur Size: Auto<br/>           Max Jump Distance: Auto: 15.7 - 16.8 pix</p> | <p><b>Results</b></p> <p>Stats: Merged Data</p> <p>Mean: 99.9 nm<br/>           Mode: 73.6 nm<br/>           SD: 46.5 nm<br/>           D10: 64.2 nm<br/>           D50: 84.3 nm<br/>           D90: 165.1 nm</p> <p>Stats: Mean +/- Standard Error</p> <p>Mean: 100.2 +/- 1.3 nm<br/>           Mode: 78.2 +/- 3.2 nm<br/>           SD: 44.4 +/- 4.7 nm<br/>           D10: 65.0 +/- 2.2 nm<br/>           D50: 84.7 +/- 2.3 nm<br/>           D90: 172.8 +/- 13.1 nm</p> <p>Concentration (Upgrade): 8.02e+08 +/- 9.02e+07 particles/ml<br/>           28.7 +/- 3.1 particles/frame<br/>           31.8 +/- 3.5 centres/frame</p> |
|---------------------------------------------------------------------------------------------------------------------------------------------------------------------------------------------------------------------------------------------------------------------------------------------------------------------------------------------------------------------------------------------------------------------------------------------------------------------------------------------------------------------------------------------------------------------------------------------------------------------------------------------------------------------------------------------------------------------------------------------------------------------------------------------------------------------------------------------------------------------------------------------------------------------------------------------------------------------------------------------------------------------------------------------------------------------------------------------------------------------------------------------------------------------------------------------------------------------------------------------------------------------------------------------------------------------------------------|--------------------------------------------------------------------------------------------------------------------------------------------------------------------------------------------------------------------------------------------------------------------------------------------------------------------------------------------------------------------------------------------------------------------------------------------------------------------------------------------------------------------------------------------------------------------------------------------------------------------------------------|



Figure S27: PL-Dil, SEC fraction: 16-21

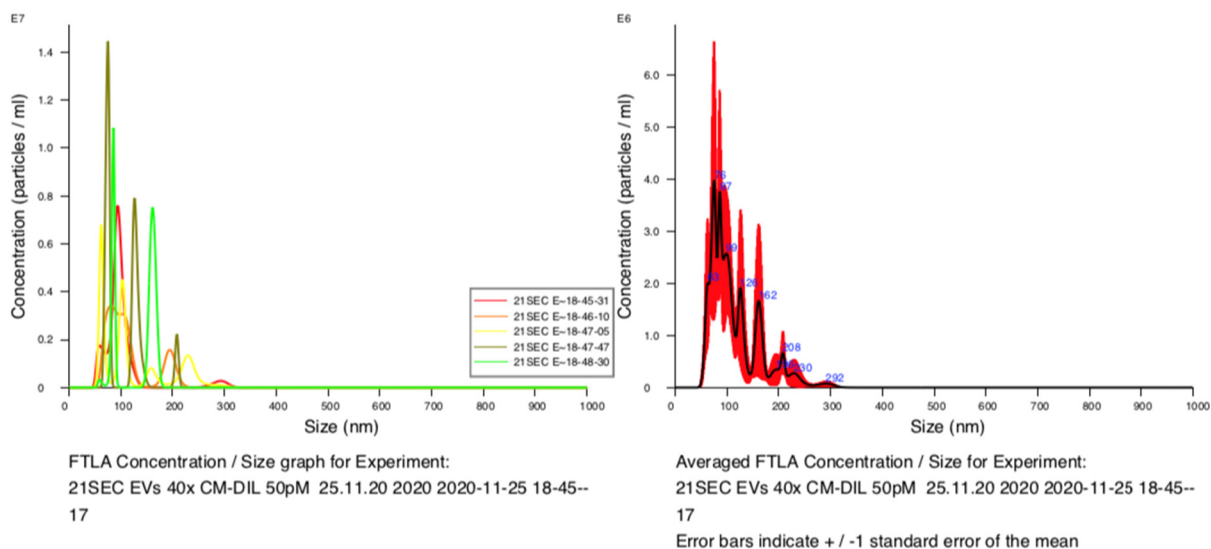

| Included Files                                              | Results                                                     |
|-------------------------------------------------------------|-------------------------------------------------------------|
| 21SEC EVs 40x CM-DIL 50pM 25.11.20 2020 2020-11-25 18-45-31 | Stats: Merged Data                                          |
| 21SEC EVs 40x CM-DIL 50pM 25.11.20 2020 2020-11-25 18-46-10 | Mean: 114.3 nm                                              |
| 21SEC EVs 40x CM-DIL 50pM 25.11.20 2020 2020-11-25 18-47-05 | Mode: 75.1 nm                                               |
| 21SEC EVs 40x CM-DIL 50pM 25.11.20 2020 2020-11-25 18-47-47 | SD: 48.7 nm                                                 |
| 21SEC EVs 40x CM-DIL 50pM 25.11.20 2020 2020-11-25 18-48-30 | D10: 67.9 nm                                                |
|                                                             | D50: 98.8 nm                                                |
|                                                             | D90: 185.3 nm                                               |
| Details                                                     | Stats: Mean +/- Standard Error                              |
| NTA Version: NTA 3.4 Build 3.4.003                          | Mean: 115.1 +/- 5.6 nm                                      |
| Script Used: SOP Standard Measurement 06-45-17PM 25--       | Mode: 79.5 +/- 5.3 nm                                       |
| Time Captured: 18:45:17 25/11/2020                          | SD: 46.6 +/- 5.4 nm                                         |
| Operator: Nadya24.11.20                                     | D10: 70.1 +/- 3.7 nm                                        |
| Pre-treatment:                                              | D50: 106.5 +/- 12.7 nm                                      |
| Sample Name: 21SEC EVs 40x CM-DIL 50pM 25.11.20 2020        | D90: 170.8 +/- 20.5 nm                                      |
| Diluent: PBS                                                | Concentration (Upgrade): 2.34e+08 +/- 1.14e+07 particles/ml |
| Remarks:                                                    | 8.7 +/- 0.1 particles/frame                                 |
|                                                             | 9.5 +/- 0.2 centres/frame                                   |
| Capture Settings                                            |                                                             |
| Camera Type: sCMOS                                          |                                                             |
| Laser Type: Blue488                                         |                                                             |
| Camera Level: 13                                            |                                                             |
| Slider Shutter: 1232                                        |                                                             |
| Slider Gain: 175                                            |                                                             |
| FPS: 25.0                                                   |                                                             |
| Number of Frames: 749                                       |                                                             |
| Temperature: 24.6 - 24.8 °C                                 |                                                             |
| Viscosity: (Water) 0.893 - 0.896 cP                         |                                                             |
| Dilution factor: Dilution not recorded                      |                                                             |
| Analysis Settings                                           |                                                             |
| Detect Threshold: 17                                        |                                                             |
| Blur Size: Auto                                             |                                                             |
| Max Jump Distance: Auto: 14.1 - 23.7 pix                    |                                                             |
